1 **Genome-wide association identifies candidate genes for drought tolerance in coast redwood**  
2 **and giant sequoia**

3  
4 Amanda R. De La Torre<sup>1\*§</sup>, Manoj K. Sekhwal<sup>1</sup>, Daniela Puiu<sup>2</sup>, Steven L. Salzberg<sup>2</sup>, Alison  
5 Dawn Scott<sup>3‡</sup>, Brian Allen<sup>3</sup>, David B. Neale<sup>3§</sup>, Alana R.O. Chin<sup>3</sup>, Thomas N. Buckley<sup>3\*</sup>

6  
7 <sup>1</sup> School of Forestry, Northern Arizona University, 200 E. Pine Knoll, AZ86011, Arizona, USA.

8 <sup>2</sup> Department of Biomedical Engineering, Computer Science and Biostatistics & Center for  
9 Computational Biology, Johns Hopkins University, 3100 Wyman Park Dr, Wyman Park Building,  
10 room S220, Baltimore, MD21211, USA

11 <sup>3</sup> Department of Plant Sciences, University of California, Davis, One Shields Avenue, Davis, CA  
12 95616, USA.

13  
14  
15 \*Shared first authorship

16 §Corresponding authors: Amanda De La Torre, [Amanda.de-la-torre@nau.edu](mailto:Amanda.de-la-torre@nau.edu); David B. Neale  
17 [dbneale@ucdavis.edu](mailto:dbneale@ucdavis.edu)

18 ‡ Current affiliation: Department of Chromosome Biology, Max Planck Institute for Plant  
19 Breeding Research, Cologne, NRW, Germany

20  
21  
22  
23 Running head: Genomics of drought in redwoods

24 Journal:

25 Number of words: 7805

26 Number of Tables: 3

27 Number of Figures: 6

28 Supporting Information: Tables S1-S7, Figures S1-S5

29

30

31 **SUMMARY**

32 Drought is a major limitation for survival and growth in plants. With more frequent and severe  
33 drought episodes occurring due to climate change, it is imperative to understand the genomic and  
34 physiological basis of drought tolerance to be able to predict how species will respond in the future.  
35 In this study, univariate and multitrait multivariate GWAS methods were used to identify candidate  
36 genes in two iconic and ecosystem-dominating species of the western US – coast redwood and  
37 giant sequoia – using ten drought-related physiological and anatomical traits and genome-wide  
38 sequence-capture SNPs. Population level phenotypic variation was found in carbon isotope  
39 discrimination, osmotic pressure at full turgor, xylem hydraulic diameter and total area of  
40 transporting fibers in both species. Our study identified new 78 new marker × trait associations in  
41 coast redwood and six in giant sequoia, with genes involved in a range of metabolic, stress and  
42 signaling pathways, among other functions. This study contributes to a better understanding of the  
43 genomic basis of drought tolerance in long-generation conifers and helps guide current and future  
44 conservation efforts in the species.

45

46 **Key words:** Drought, GWAS, *Sequoiadendron giganteum*, *Sequoia sempervirens*, polygenic  
47 traits, carbon isotope discrimination, stomata, osmotic pressure, xylem

48

49 **Significance Statement:** Climate change brings more frequent and severe drought events that  
50 challenge the survival of natural populations of plants. While most of our knowledge about drought  
51 tolerance comes from annual and domesticated plants, the genomic basis of drought tolerance in  
52 long-generation trees is poorly understood. Here, we aim to fill this gap by identifying candidate  
53 genes in two conifer species, coast redwood and giant sequoia.

## 54 INTRODUCTION

55  
56 Understanding the genomic basis of phenotypic trait variation and its distribution across a species'  
57 range is indispensable to predict species response to global climate change and to develop  
58 conservation and management guidelines (Bellard *et al.*, 2012; Razgour *et al.*, 2019). This has  
59 become an urgent need in the western United States, where longer and more severe drought events  
60 have resulted in massive tree mortality in the last ten years (Allen *et al.*, 2010; Hicke *et al.*, 2015;  
61 Adams *et al.*, 2017; Stephenson *et al.*, 2018; Fettig *et al.*, 2019). Drought stress, manifesting as  
62 low soil water content and/or high evaporative demand, poses significant challenges to the  
63 establishment, development, growth and survival of long-generation tree species such as conifers  
64 (Adams and Kolb, 2005), and also predisposes trees to pathogens and pests (Jactel *et al.*, 2012;  
65 Gaylord *et al.*, 2013). Despite the economic importance of conifers and their dominance in global  
66 arid, semi-arid, montane and circumpolar zones, the genomics of drought and thermal tolerance  
67 have received little attention and lag behind studies in other plant species (Moran *et al.*, 2017).

68  
69 Conifer species have large genome sizes (8-34 Gb; Murray *et al.*, 2004; De La Torre *et al.*, 2014),  
70 and large genetic-to-physical distance ratio (>3000 kb/cM). Linkage disequilibrium (LD) in coding  
71 regions rapidly decays within a short distance, which complicates the identification of genes  
72 responsible for phenotypic variation (Neale and Savolainen, 2004). Another challenge of  
73 genotyping many individuals is the need to use a massive number of genome-wide markers in  
74 large-genome trees such as conifers. The development of high-throughput systems such as next  
75 generation sequencing (NGS) and SNP arrays should help overcome this difficulty, since they  
76 allow rapid and cost-effective genotyping over a massive number of SNPs (McCarthy *et al.*, 2008).  
77 In addition, the rapid advancement of genome sequencing and bioinformatics approaches have

78 opened the door to more comprehensive assessments of population-level diversity (McGuire *et al.*,  
79 2020). Association mapping principally exploits evolutionary recombination at the natural  
80 population level (Myles *et al.*, 2009). A mixed linear model (MLM) method (Yu *et al.*, 2006) was  
81 proposed to better control for population structure and the imbalanced kinships among various  
82 individuals (Pritchard *et al.*, 2000). Until recently, determining the molecular basis of heritable  
83 trait variation has been challenging in conifer species, and genome-wide association studies have  
84 been limited to a few species and traits (Lu *et al.*, 2017; Baison *et al.*, 2020; Elfstrand *et al.*, 2020;  
85 Weiss *et al.*, 2020; Chen *et al.*, 2021; De La Torre *et al.*, 2021a). For example, association studies  
86 of drought tolerance have only been performed with pre-selected candidate genes (Gonzalez-  
87 Martinez *et al.*, 2008; Eckert *et al.*, 2010; Cumbie *et al.*, 2011; Trujillo-Moya *et al.*, 2018;  
88 Depardieu *et al.*, 2021) and no large-scale, genome-wide studies have been reported to date.

89  
90 Giant sequoia (*Sequoiadendron giganteum* [Lindl.] J.Buchh.) is a slow-growing, long-lived,  
91 outcrossing species that grows in discrete groves on the western slope of the Sierra Nevada  
92 mountains in California. Giant sequoia is diploid and has a genome size of 8.125 Gbp (Scott *et al.*,  
93 2020). The species occurs in a highly disjunct range consisting of approximately 75 groves,  
94 spanning around 420 km north to south and ranging from 830 to 2700 m elevation. Giant sequoia  
95 is the most moisture-demanding species of mixed conifer forests, mainly because of its very high  
96 leaf area: mature trees can have  $> 10^8$  leaves (Sillett *et al.*, 2015; Dodd and DeSilva, 2016). Coast  
97 redwood (*Sequoia sempervirens* [D.Don] Endl.) is also slow-growing and long-lived but differs  
98 from giant sequoia in that it is hexaploid (genome size is 26.5 Gbp; Neale *et al.* 2021) and often  
99 reproduces asexually. The species once had a nearly continuous distribution along the Pacific  
100 Coast in Oregon and California, but natural populations were severely reduced by intensive

101 logging beginning in the 19<sup>th</sup> and 20<sup>th</sup> centuries (Burns *et al.*, 2018; Breidenbach *et al.*, 2020). Both  
102 coast redwood and giant sequoia are listed as endangered by the International Union for  
103 Conservation of Nature (IUCN) Red List of Threatened species (Farjon and Schmid, 2013).  
104 However, increased growth rates in response to elevated CO<sub>2</sub> (Sillett *et al.*, 2015) may make these  
105 two species good candidates for forest restoration and carbon sequestration.

106  
107 Being the tallest and fourth-tallest conifers, the crowns of coast redwood and giant sequoia can  
108 stretch over ~100m of vertical extent, and thus these species have the greatest degree of within-  
109 crown phenotypic plasticity of any conifers measured, both responding more strongly to water  
110 availability than to light (Chin and Sillett 2016, 2019). Like other members of the Cupressaceae,  
111 coast redwood and giant sequoia lack an endodermis to constrain the breadth of their vascular  
112 development, allowing the proliferation of traits promoting water-stress tolerance with increasing  
113 height (Oldham *et al.*, 2010; Chin and Sillett 2016). Less clear is whether populations of these  
114 species have adapted genetically to environmental variation across their ranges, in ways that either  
115 limit or enhance phenotypic plasticity in traits related to drought tolerance. In this study, we  
116 sampled natural populations across the current ranges of both giant sequoia and coast redwood,  
117 grew cuttings in pots in a greenhouse common garden for two years, measured a range of  
118 physiological and anatomical traits thought to be relevant for drought resilience, and tested for  
119 significant genome-wide associations with ten different drought-related traits using univariate and  
120 multivariate GWAS methods. We aimed to dissect the genomic basis of drought tolerance in each  
121 species, in order to identify the hardiest individuals and populations that might be used for  
122 conservation and restoration efforts in the species.

123

124

125 **RESULTS**

126 *Genotype datasets*

127 A total of 577,774 and 767,242 SNPs were called for 71 SEGI and 82 SESE individuals,  
128 respectively. From them, 52,987 (9%) SNPs from 71 SEGI individuals; and 57,357 (7%) SNPs  
129 from 82 SESE individuals were retained after filtering using TASSEL. The before and after  
130 filtering SNPs statistics for each of the SEGI and SESE individuals are reported in Supplementary  
131 Tables S1 and S2, respectively. The filtered SNPs datasets were retained for further GWAS  
132 analyses.

133

134 *Phenotype datasets*

135 For the phenotypic traits listed in Table 1, within-genotype mean trait values varied widely across  
136 genotypes for each species (Figure 1), and showed variation across the species' natural ranges  
137 (Figure 2). In coast redwood, the relative spread of means across genotypes was greatest for central  
138 fiber area, C:N ratio and SMA, whereas in giant sequoia the spread was greatest for total areas of  
139 transfusion tissue and xylem. In both species, the relative spread was smallest for carbon isotope  
140 discrimination and xylem hydraulic diameter. Consistent with established patterns, trait values in  
141 giant sequoia indicated a relatively more xeric habit than those in coast redwood; e.g., total xylem  
142 and transfusion tissue areas and xylem hydraulic diameter were all smaller in giant sequoia, and  
143 osmotic pressure at full turgor and leaf mass per unit area were greater in giant sequoia. Trait  
144 variability across genotypes grown in our common garden was generally lower than that seen along  
145 vertical gradients within the crowns of individual trees (cf. red bars in Figure 1) (Oldham *et al.*,  
146 2010; Chin and Sillett 2016).

147

148 *Correlations among traits and environmental parameters*

149 In SEGI, C:N ratio (CN) was positively correlated with shoot mass per area (SMA) ( $r=0.33$ ,  $p$ -  
150 value= $0.004$ ), and carbon isotope discrimination (D13C) ( $r=0.32$ ,  $p$ -value= $0.006$ ). Total xylem  
151 part of vascular bundle (XA) was also positively correlated with carbon isotope discrimination  
152 ( $r=0.24$ ,  $p$ -value= $0.04$ ); and total area of transfusion tissue (TA) ( $r=0.43$ ,  $p$ -value= $0.0001$ ). All  
153 correlations results can be found in Figure 3. Carbon isotope discrimination was positively  
154 correlated with latitude ( $r=0.26$ ,  $p$ -value= $0.025$ ) and negatively associated with longitude ( $r=-0.3$ ,  
155  $p$ -value= $0.009$ ) and elevation ( $r=-0.27$ ,  $p$ -value= $0.021$ ). C:N ratio was negatively correlated with  
156 elevation ( $r=-0.27$ ,  $p$ -value= $0.019$ ).

157  
158 Carbon isotope discrimination was positively correlated with several precipitation variables (Bio3,  
159 Bio12, Bio13, Bio16, Bio17 and Bio19), suggesting populations at the northern distribution of the  
160 species range, located at more humid locations and lower elevations have higher water use  
161 efficiency than populations in other locations when grown in a common garden. Osmotic pressure  
162 at full turgor (PIFT) was positively correlated with different measures of temperature and  
163 precipitation variation (Bio4-Temperature seasonality, Bio7-Temperature Annual Range, Bio15-  
164 Precipitation seasonality) and negatively correlated with Relative Humidity (RH). Finally, xylem  
165 hydraulic diameter (HD) was correlated with Mean Annual Solar Radiation (MAR). All correlation  
166 results can be found in Figure S1.

167  
168 In SESE, the total area of central fibers (FA) was negatively correlated with latitude ( $r= -0.3$ ,  $p$ -  
169 value= $0.006$ ), and positively correlated with longitude ( $r=0.23$ ,  $p$ -value= $0.037$ ). The same trait  
170 was also negatively correlated with various measures of precipitation including MAP, Bio12-

171 Bio19 and positively correlated with several temperature-related variables (MCMT, EMT, Bio3,  
172 Bio8, Bio11). Osmotic pressure at full turgor (PIFT) was positively correlated with different  
173 precipitation variables such as Bio13, Bio16 and Bio19. Shoot mass per unit area (SMA) was  
174 positively correlated with osmotic pressure at full turgor ( $r = 0.33$ ,  $p = 0.002$ ), C:N ratio ( $r = 0.39$ ,  
175  $p = 0.0003$ ) and total xylem area ( $r = 0.29$ ,  $p = 0.01$ ). Finally, xylem hydraulic diameter (HD) was  
176 positively correlated with Mean Annual Temperature (MAT), DD5, EMT and Eref, and negatively  
177 with degree days below 18 °C (DD\_18). All correlation results can be found in Figure S2.

178  
179 Genotypes from coast redwood's latitudinal and precipitation extremes had very little overlap  
180 within the common-garden trait-space, but in all cases overlapped by at least 70% with  
181 intermediate categories; trees originating from intermediate sites thus did not have readily  
182 detectable trait differences from either extreme. North and South genotypes shared 19% of their  
183 unified trait-space, while Wet and Dry genotypes only intersected in 14% of their unified trait-  
184 space, with low levels of overlap indicating multivariate differences in the suites of traits  
185 associated with both latitudinal and precipitation extremes. Wet and Dry sites had highly  
186 conserved traits compared to Intermediate Precipitation sites, which had 5X less point density  
187 within their phenotypic volumes, suggesting a broader hydraulic niche driving much less  
188 specialization. Likewise, genotypes from coast redwood's central latitudes were spread across  
189 almost 3X the relative trait-space of North or South genotypes.

190

### 191 *Genome-wide association study (GWAS)*

192 Genome-wide association analyses of 52,987 SNP markers and 71 individuals in SEGI; and 57,357  
193 SNP markers and 82 individuals in SESE were performed to detect marker-trait associations.



194 Mixed linear model (MLM) and general linear mixed model (GLM) were used to determine  
195 associations between genotypic and phenotypic datasets in TASSEL. In SEGI, a total number of  
196 ~476K associations were tested among 52.987k SNPs and all phenotypic traits listed in Table 1  
197 (stomatal density [SD] and area of transporting fibers [FA] were excluded from this analysis, in  
198 which SD was not measured and transporting fibers were not observed). In SESE, a total of ~573K  
199 associations were tested among 57.357k SNPs and all nine phenotypes. Bonferroni correction for  
200 multiple testing was performed to adjust p-values. The general linear mixed model (GLM)  
201 identified a total number of 78 significant SNPs, 77 of them were associated with total area of  
202 transfusion tissue (TA) and one with total area of transporting fibers (FA) (Table 2, Table S3).  
203 These SNPs were distributed across 22 scaffolds and matched 23 genes in the genome of coast  
204 redwood (Table S3). In SEGI, GLM only identified 2 SNPs, located at close distance in  
205 chromosome 9 and associated with osmotic pressure at full turgor (PIFT) with a p-value  $< 9.00 \cdot 10^{-6}$   
206 after Bonferroni correction (Table 2, Table S4, Figure S3). Manhattan plots of  $-\log_{10}(P)$  values  
207 for each SNPs versus chromosomal or scaffold positions were generated from these datasets.  
208 TASSEL MLM did not identify any significant marker x trait associations in any of the species  
209 after Bonferroni correction at threshold p-value  $< 0.05$ .

210

211 Subsequently, univariate linear mixed model (uLMM) and multivariate linear mixed model  
212 (mvLMM) approaches were performed in GEMMA to identify significant SNPs. In SESE,  
213 mvLMM identified 31 significant SNPs (p-value  $< 9.00 \cdot 10^{-6}$ ), and uLMM, 29 SNPs (p-value  $<$   
214  $9.00 \cdot 10^{-6}$ ) (Figure 4; Tables S5 and S6; Figure S4). Of the 29 SNPs identified from uLMM analysis,  
215 27 were significantly associated with total area of transfusion tissue (TA), one with xylem  
216 hydraulic diameter (HD), and one with total area of transporting fibers (FA). In SEGI, mvLMM

217 identified 3 significant SNPs and uLMM only one ( $p\text{-value} < 9.00 \cdot 10^{-6}$ ) associated with total xylem  
218 area, XA (Figure 5; Table S7; Figure S5). These SNPs were in chromosomes 5, 8 and 9 of the  
219 giant sequoia genome (Table S7). Among all three-analysis including GLM at TASSEL, uLMM  
220 and mvLMM at GEMMA, a total 27 significant SNPs were consistently found in SESE (Figure  
221 6). For SEGI, only one significant SNP (chromosome 8) was shared among two of the GWAS  
222 analyses (mvLMM and uLMM; Figure 5). Manhattan plots for each SNP versus chromosomal or  
223 scaffold positions for GLM (TASSEL), and uLMM and mvLMM (GEMMA) analyses for both  
224 species were reported in Figures 4-5, and Figures S3-S5.

225  
226 In SESE, all significant SNPs associated with TA, came from genes involved in the ubiquitin  
227 system, cationic antimicrobial peptide (CAMP) resistance, hedgehog signaling pathway, glycine,  
228 serine and threonine metabolism, lysosome, apoptosis, plant-pathogen interaction, renin-  
229 angiotensin system, and protein digestion and absorption (Table 3). In SESE, gene SESE\_010495  
230 was annotated as a F-box protein, SESE\_026053 as a motile sperm domain-containing protein,  
231 SESE\_026278 as a BTB/POZ domain-containing protein, SESE\_028233 as a protein HOTHEAD-  
232 like, and SESE\_039821 as a receptor-like protein kinase HAIKU2 (Table 3). In SEGI, a significant  
233 SNP at the gene SEGI\_21288 associated with PIFT was identified as an uncharacterized protein.  
234 The GO IDs and GO names of these genes of significant SNPs in SESE and SEGI were reported  
235 in Table 3.

## 236 237 **DISCUSSION** 238

239 By using a combination of univariate and multivariate methods, our study was able to identify  
240 several genes associated with drought-related traits in two ecologically important conifer species:

241 coast redwood and giant sequoia. Previous genome-wide studies identifying candidate genes for  
242 drought tolerance have been absent for both of these important species. Here, we report notable  
243 phenotypic variation for several drought-related traits among natural populations (or groves) of  
244 both giant sequoia and coast redwood grown in a common garden. The development of genome-  
245 wide methods, gene identification, functional annotation and location in the species' genomes has  
246 only been possible due to the recent sequencing of both species' reference genomes (Scott *et al.*,  
247 2020; Neale *et al.*, 2021).

248

#### 249 *Polygenic basis of drought tolerance*

250 Our results suggest a polygenic basis of drought tolerance, consistent with previous genome-wide  
251 association studies in other complex traits in conifer species, with candidate genes distributed in  
252 different chromosomes or scaffolds, and small to moderate effect sizes (Baison *et al.*, 2020; Weiss  
253 *et al.*, 2020; De La Torre *et al.*, 2021a). The exact location of candidate genes in the genome of  
254 coast redwood could only be determined at the scaffold level since the current assembly of the  
255 reference genome is not chromosome-scale (Neale *et al.*, 2021). Univariate methods identified a  
256 total of 78 new significant associations for coast redwood, 27 of them were consistently found by  
257 all three univariate and multivariate GWAS methods in this study. All these SNPs (except one)  
258 were associated with variations in the total area of transfusion tissue associated with the leaf  
259 vasculature. However, when using the multi-trait multivariate mvLMM method in GEMMA, we  
260 found that many of the SNPs identified by TASSEL were associated with a group of drought-  
261 related traits, either vascular or carbon isotope-related traits. This is coincident with the presence  
262 of significant correlations among traits in these groups (Figure 3), suggesting the multitrait  
263 multivariate GWAS provides a more accurate picture of the complex trait architecture in the

264 species. Six genes associated with total area of transfusion tissue in coast redwood were also  
265 associated with Mean Annual Temperature, Mean Annual Precipitation or Climate Moisture  
266 Deficit in a previous environmental genome-wide association study using the same SNP set (Table  
267 2; De la Torre *et al.*, 2021b). Transfusion tissue area triples with height in tall coast redwood  
268 crowns, and is associated with low water availability and less-negative values of  $\delta^{13}\text{C}$ ; it buckles  
269 under drought stress, releasing water that helps protect the leaf and isolate damage (Oldham *et al.*,  
270 2010).

271  
272 The number of significant associations was much lower in giant sequoia with only six significant  
273 associations discovered by all GWAS methods, with two of them associated with osmotic pressure  
274 at full turgor, one with the total xylem area, and three with combinations of traits (Figure 5). The  
275 multitrait multivariate mvLMM method did not result in significant differences or a higher number  
276 of candidate genes when compared with the univariate methods. Significant genes were involved  
277 in RNA-dependent DNA biosynthetic processes and catalytic activity (Table 3). One of the genes,  
278 SEGI\_21288 (chromosome 9) associated with osmotic pressure, was also associated with Mean  
279 Annual Precipitation in a previous GEA study in giant sequoia (De La Torre *et al.*, 2021b).

280  
281 In coast redwood, most associations were clustered in a small number of scaffolds and genes. For  
282 example, scaffold 16773 harbors three closely located genes (SESE\_102359, SESE\_121791,  
283 SESE\_010570) involved in proteolysis (Table 3); scaffold 203021 has four different genes  
284 (SESE\_026053, SESE\_008114, SESE\_041334 and SESE\_031915) with unknown functions, and  
285 scaffold 344217 has two genes (SESE\_039821 and SESE\_025289), the first one, a receptor-like  
286 protein kinase HAIKU2 involved in protein phosphorylation, and the second one with unknown

287 function. The identification of other potential genomic clusters could only be possible with the  
288 presence of a chromosome-scale genome assembly in coast redwood. No genomic clusters were  
289 observed in giant sequoia mainly due to the small number of significant associations.

290  
291 Despite the relatively small sample size of the common garden experiments, substantial phenotypic  
292 variation was found in several of the drought-related traits measured in this study. For example,  
293 C:N ratio, total area of transfusion tissue, total xylem area, and total area of central conducting  
294 fibers showed great variation in the species (Figure 1). This large variation, however, did not  
295 translate into the identification of large numbers of candidate genes. There might be several  
296 explanations for this: the presence of high levels of plasticity for these drought-related traits in the  
297 species; a large difference between the number of markers and samples leading to false positives  
298 after stringent multiple testing correction; or the relatively low power to detect rare variants due to  
299 small sample sizes. Due to the genome-wide distribution and the number of markers included in  
300 this study, we don't consider the number of markers to be a potential limitation in our study despite  
301 the rapid decay of linkage disequilibrium in the species.

302  
303 *High levels of phenotypic variance in drought-related traits*

304 Giant sequoia is known for its high phenotypic plasticity and multiple adaptations to cope with  
305 water stress, including shoot and leaf succulence, leaf toughness, tight stomatal control of water  
306 loss and increasing xylem cavitation resistance with height (Pitterman *et al.*, 2012; Ambrose *et al.*,  
307 2015; Chin and Sillet 2016). In a greenhouse study, Ambrose *et al.*, (2016) found contrasting  
308 drought-responses strategies between the species, with greater stomatal closure leading to an  
309 increase in intrinsic water-use efficiency and lower xylem embolism under severe drought in giant

310 sequoia than in coast redwood. As an adaptation to their natural environment, shade-tolerant coast  
311 redwood seedlings will invest biomass into above-ground woody stem, which enhances  
312 competitive success in humid, closed canopy conditions with shallow water tables seen in northern  
313 forests (Sawyer *et al.*, 2000; Ambrose *et al.*, 2016). In contrast, though larger as adults, giant  
314 sequoia seedlings invest more biomass in developing root growth as desiccation is an important  
315 factor contributing to early mortality in the species (Havey *et al.*, 1980).

316

317 A study measuring shoot water potential, leaf gas exchange, xylem embolism and growth  
318 concluded there were not significant differences at the population level in neither coast redwood  
319 nor giant sequoia (Ambrose *et al.*, 2016). In contrast, our study found significant population-level  
320 differences in three traits for each species (carbon isotope discrimination, osmotic pressure, and  
321 xylem hydraulic diameter for giant sequoia, and total area of central fibers, osmotic pressure and  
322 xylem hydraulic diameter for coast redwood). For example, carbon isotope discrimination of bulk  
323 leaf tissue for plants grown in our common garden was positively correlated with several  
324 precipitation and geographic variables for each genotype's environment of origin. For a given  
325 photosynthetic capacity, a decrease in carbon isotope discrimination (i.e., less negative values of  
326  $\delta^{13}C$ ) implies reduced stomatal opening and greater water use efficiency. Thus, our results  
327 suggest that giant sequoia genotypes collected from sites near the species' northern limit, or from  
328 more humid or lower-elevation (< 2000 m) sites, have higher water use efficiency when grown in  
329 a common garden than genotypes from more southern, drier or higher-elevation sites. Under these  
330 criteria, we identified three high-elevation groves that might need conservation due to a higher  
331 sensitivity to drought (given lower carbon isotope values and lower water use efficiency) should  
332 their year-round supplies of surface water diminish; these are Redwood Mountain (36.69 latitude,

333 -118.92 longitude), Giant Forest (36.56 latitude, -118.75 longitude) and Atwell Mill (36.46  
334 latitude, -118.68 longitude). All these groves are located over 2000 m of elevation, where cold  
335 tolerance traits, such as narrow xylem tracheid diameters, may have been selected for over those  
336 supporting drought survival.

337

338 Within-crown phenotypic plasticity in tall trees of both coast redwood and giant sequoia is only  
339 slightly greater than that observed in the common garden, for comparable traits (red bars in Figure  
340 1; Oldham *et al.*, 2010; Chin and Sillett 2016). The innate ability to acclimate to environmental  
341 microclimatic conditions, and the mostly small differences in within-crown compared to within-  
342 garden variation suggests that naturally recruiting trees of northern provenance may have a  
343 different range of plasticity less suited to withstand climatic pressures comparable to conditions  
344 experienced in the southern range. Indeed, southernmost coast redwood trees reach a maximum  
345 height 20-30 m shorter than northern trees but have similar treetop levels of transfusion tissue  
346 investment (Ishii *et al.*, 2014). In contrast to the two species explored here, Douglas-fir  
347 (*Pseudotsuga menziesii*) has varying amounts of within-crown trait variability across its much  
348 larger range (Chin and Sillett 2019), suggesting that future genomic work may find tradeoffs  
349 between geographic and individual-level trait variation.

350

351 In coast redwood, larger values for two traits associated with the capacity for water transport – the  
352 total area of conducting fibers contributing to water transport, and the xylem hydraulic diameter  
353 (a measure of the effective mean size of individual xylem conduits, accounting for nonlinear  
354 effects of conduit size on water transport) – were associated with lower precipitation and higher  
355 temperatures in the environment of origin for genotypes. For example, genotypes collected from

356 lower latitudes and more eastern locations (stands at Warm Springs Creek [38.68 latitude, -123.11  
357 longitude] and Bodega [38.36 latitude, -122.96 longitude]) had particularly large areas devoted to  
358 central conducting fibers. Central fibers are found in coast redwood at their greatest abundance in  
359 a distinct shoot morphotype, specialized for absorption of water (Alana Chin, unpublished data),  
360 so the increased area at dry sites may indicate a reliance on summertime foliar water uptake and  
361 use of alternate hydraulic pathways. These traits may indicate adaptations that enable water  
362 transport to be sustained in environments that are relatively warm and dry for this species;  
363 sustained water transport would, in turn, minimize leaf water stress and enable leaf stomata to  
364 remain open to allow photosynthesis (Brodribb *et al.*, 2007). Thus, these groves might represent  
365 sources of drought-tolerant germplasm for coast redwood.

366  
367 Coast redwood genotypes from wet and dry locations have distinct combinations of water-stress  
368 related functional traits when considered on a multivariate level, and far less variability than seen  
369 among intermediate rainfall sites – suggesting adaptive specialization. Intraspecific trait  
370 convergence is a characteristic response to abiotic stress and so is expected on environmentally  
371 harsh, typically dry or cold, range ends (Mitchell and Baaker 2014, Van Nulan *et al.*, 2020). In the  
372 case of coast redwood, rainforest conditions may present unique challenges due to months of  
373 continuous leaf wetness and heavy cloud cover, resulting in phenotypes on both latitudinal range-  
374 ends that overlap with intermediate zones, but share little of the same trait-space. Better group  
375 separation based on precipitation-class, rather than latitude, may indicate that climatic adaptation  
376 has been more important than distance between populations in determining the coast redwood  
377 water-stress phenotype. Latitudinal groupings may be undetectable in giant sequoia because of the



378 relatively consistent climate within its range; coast redwood samples came from sites spanning  
379 >2.5X the climatic variability (based on mean coefficient of variation).

380

### 381 *Functional annotation of candidate genes*

382 Candidate genes found in this study indicate a complex genomic architecture of drought tolerance  
383 with many genes involved in many important biological functions related to growth, abiotic stress  
384 resistance, and disease resistance. For example, gene SESE\_010495 associated with total area of  
385 transfusion tissue was involved in the ubiquitin system. The ubiquitin-proteasome system controls  
386 the degradation of most proteins in the cells. It provides a rapid strategy to control many cellular  
387 processes by degrading specific proteins, playing a critical role in the regulation of many biological  
388 processes such as hormonal signaling, growth, embryogenesis, senescence, and environmental  
389 stress (Sharma *et al.*, 2016; Xu and Xue 2019). F-box domain proteins have been found to play  
390 important roles in abiotic stress responses via the ubiquitin pathway. For example, the study by  
391 Zhou *et al.*, (2015) found that overexpression of *TaFBA1* enhanced drought tolerance in transgenic  
392 plants, confirming the importance of F-box proteins in plants' tolerance to multiple stress  
393 conditions.

394

395 A significant SNP at the gene SESE\_026278 which annotated as BTB/POZ domain-containing  
396 protein was involved in hedgehog signaling pathway. The BTB/POZ domain is an evolutionarily  
397 conserved and widely distributed structural motif found involved in different biological processes,  
398 such as transcriptional regulation, cytoskeletal organization, and formation of voltage-gated  
399 channels (Collins *et al.*, 2001). Overexpression of GmBTB/POZ in soybean resulted in enhanced  
400 resistance to *Phytophthora sojae* (*P. sojae*). The activities and expression levels of enzymatic

401 superoxide dismutase (SOD) and peroxidase (POD) antioxidants were significantly higher in  
402 GmBTB/POZ-overexpressing transgenic soybean than in wild-type (WT) plants (Zhang *et al.*,  
403 2019).

404

405 Another important candidate gene identified in our study was SESE\_039821, a receptor-like  
406 protein kinase. Receptor-like kinases are important signaling components that regulate a variety  
407 of cellular processes. Protein kinases regulate metabolic pathways and are intimately involved in  
408 cellular signaling networks (Wang *et al.*, 2007). An Arabidopsis cDNA microarray analysis led to  
409 the identification of the cysteine-rich receptor-like kinase CRK36 responsive to the necrotrophic  
410 fungal pathogen (*Alternaria brassicicola*) (Lee *et al.*, 2017). The gene *haiku2* is a mutant allele of  
411 gene *iku2*, which is a leucine-rich repeat kinase (LRR) gene involving in regulation of seed size in  
412 Arabidopsis (Luo *et al.*, 2005).

413

414 In our study, the gene SESE\_121791 was identified as cysteine protease RD19A-like and was  
415 involved in lysosome, apoptosis and plant-pathogen interaction pathways. Papain-like cysteine  
416 proteases (PLCPs) are involved in many plant processes (Zou *et al.*, 2018). Cysteine proteases  
417 were found to play a role in nodule development in soybean and in the pathogen defense (Shukla  
418 *et al.*, 2014; van Wyk *et al.*, 2014). Also, cysteine protease (*AdCP*) gene in the wild peanut  
419 (*Arachis diogeni*) was differentially expressed when it was challenged with the late leaf spot  
420 pathogen (Shukla *et al.*, 2014).

421

422 The gene SESE\_075160 identified by GLM at TASSEL in our study was identified as chlorophyll  
423 a/b binding protein. The light-harvesting chlorophyll *a/b*-binding (LHCB) members were shown

424 to be targets of an ABA-responsive WRKY-domain transcription factor, which  
425 represses *LHCB* expression to balance the positive function of the LHCBs in ABA signaling.  
426 Consequently, it revealed that ABA is an inducer that fine-tunes *LHCB* expression through  
427 repressing the WRKY40 transcription repressor in stressful conditions in co-operation with light,  
428 which allows plants to adapt to environmental challenges (Liu *et al.*, 2013).

429

430 This study is a step forward to understand the genomics of drought tolerance in long-generation  
431 conifer species. Genomic studies have been limited in conifers due to their large genome sizes,  
432 and long-generation times. Given the high levels of phenotypic variance despite the relatively  
433 small sample sizes in both coast redwood and giant sequoia found in this study, long-term studies  
434 with larger sample sizes are warranted. For that purpose, coast redwood seedlings measured in this  
435 study have been planted in long-term common gardens in California, where different phenotypes  
436 can be evaluated as trees mature. This new resource, together with our newly sequenced reference  
437 genomes of giant sequoia and coast redwood (Scott *et al.*, 2020; Neale *et al.*, 2021) will help  
438 develop future genomic studies in the species. A thorough knowledge of the interconnection  
439 among plasticity, genomics and physiological processes is needed to predict species' responses to  
440 future warmer conditions and to design conservation and management strategies.

441

## 442 **EXPERIMENTAL PROCEDURES**

443

### 444 *Foliage collection for greenhouse establishment*

445 Juvenile foliage of coast redwood (SESE) was collected from the Kuser common garden (Kuser  
446 *et al.*, 1995) hedge orchard growing in Russell Reserve (University of California field station,  
447 Contra Costa County, California) in fall 2017. As the SESE-Kuser common garden is hedged

448 annually, juvenile primary shoots were collected for ideal propagation. Cuttings were taken of  
449 foliage from mature giant sequoia (SEGI) trees in the Fins trial (Fins, 1979) at Foresthill Divide  
450 Seed Orchard (Foresthill, California) in winter 2018. As the SEGI accessions were mature trees,  
451 juvenile foliage was sampled where possible, but sampling was restricted to plagiotropic growth.  
452 Collections were made to represent a wide range of geographic sites of origin, spanning the  
453 species' natural distributions.

454

455 Immediately following collection, foliage samples were misted with water, wrapped in paper  
456 towels, and stored in labeled plastic bags. Bagged samples were then kept in a cooler with ice for  
457 transport to the greenhouse, where they were stored in a refrigerated room (4 °C) for up to 24  
458 hours. One at a time, to avoid mixing of genotypes, samples were washed with water to remove  
459 debris, then briefly soaked in a disinfectant (Phyosan 20, solution of 39 mL L<sup>-1</sup>). Terminal shoots  
460 were then trimmed into cuttings approximately 10 cm long. All primary needles were removed  
461 from the lower third of the each cutting. Between 30 and 60 cuttings per genotype were stuck.  
462 Cuttings were dipped in rooting hormone (3:1 Dip N Grow:water, 7,500 PPM IBA) for 5 seconds  
463 and then stuck into rooting medium (9:1 perlite:peat by volume) with Osmocote 18-6-12 controlled  
464 release fertilizer at 1.8 kg m<sup>-3</sup> and Micromax Micronutrients at 0.7 kg m<sup>-3</sup>. Cuttings were arranged  
465 in rows, with 3 cm between individual cuttings, and a minimum of 5 cm between rows. Rooting  
466 trays were kept under mist until roots emerged (for SESE, 2-3 months; for SEGI, 4 months or  
467 longer). Rooted cuttings were carefully removed from rooting medium and potted into individual  
468 containers with growing medium, individually labeled, staked with bamboo if needed, and returned  
469 to the greenhouse. Re-potted plants were hand watered for 3-4 weeks and then placed on irrigation  
470 drip.

471  
472 For SESE genotyping, fresh needles were collected from a selected ramet from each of the  
473 surviving 92 clonal genets. Overall, these samples were sourced from 66 locations, with 1-3 source  
474 trees per population. For SEGI genotyping, fresh needles were sampled from a selected ramet from  
475 each of the surviving 90 clonal genets. These SEGI accessions came from 23 groves, with 1-9  
476 samples from each population. Additionally, six SEGI accessions were included as technical  
477 replicates, resulting in 96 genotyped samples total.

478  
479 *DNA extraction*

480 Young needles were collected from a selected ramet from each of the surviving 92 SESE and 90  
481 SEGI genets. They were stored on ice for transport, then flash-frozen in liquid nitrogen, stored in  
482 a -80°C freezer for 48 hours, and lyophilized (48 hours for SEGI & 72 hours for SESE). Global  
483 DNA (gDNA) was extracted with the Omega Biotek E-Z 96 Plant DNA kit and an Eppendorf  
484 automated pipetting workstation at UC Davis. The DNA extraction protocol included one day of  
485 tissue lysis, followed by several steps of precipitation, filtering and elution. DNA quality was  
486 assessed using a Qubit 2.0 Fluorometer (average concentration = 24.5 ng/μL for SESE and 43.5  
487 ng/μL for SEGI), NanoDrop 8000 (average A260/280 = 1.94; average A260/230 = 1.99 for SESE  
488 and 1.6 for SEGI), and gel electrophoresis (average fragment size  $\geq$  20,000 bp). Samples were  
489 normalized to 20 ng/μL in 50 μL. The gDNA was submitted to the UC Davis Genome Center for  
490 sonication, size selection, and library preparation.

491  
492 *Sequence Capture and SNP calling*

493 Exome capture baits were designed for each species using PacBio IsoSeq RNA data combined  
494 with previously published Illumina RNAseq data (Scott *et al.*, 2020) and clustered at 95% identity  
495 to produce a set of nonredundant transcripts. The clustered transcripts were then mapped to the  
496 reference assembly at high stringency using gmap. For SEGI, the regions of matches were  
497 submitted to Roche (Madison, WI) where 120-mer oligos were designed to cover the target regions  
498 at 2x tiling density. For SESE, the regions of matches between genome sequence and transcript  
499 sequences were submitted to Roche for 120-mer oligos were designed to cover the target regions  
500 at 2x tiling density. The UC Davis Genome center carried out hybridization of baits and the gDNA  
501 samples described above. The resulting libraries were pooled and sequenced on the NovaSeq 6000  
502 platform. Bowtie2 v2.2.9 (Langmead and Salzberg, 2012) was used to align sequencing capture  
503 raw reads against the reference genome assemblies of giant sequoia version 2.0  
504 ([treegenes.db.org/FTP/Genomes/Segi](http://treegenes.db.org/FTP/Genomes/Segi)) and coast redwood version 2.1  
505 ([treegenesdb.org/FTP/Genomes/Sese](http://treegenesdb.org/FTP/Genomes/Sese)). Alignments were sorted and divided into multiple sets  
506 based on reference intervals, and later processed in parallel using SAMtools v1.3.1 and BEDtools  
507 v2.25.0. SNPs were then called using BCFtools with default parameters (Li *et al.*, 2009).  
508 Haplotypes were called using Genome Analysis Toolkit (GATK v.4.1.7.0) HaplotypeCaller &  
509 GenotypeGVCF (McKenna *et al.*, 2010). SNP functional annotations were obtained from the  
510 species' reference genome annotations in the TreeGenes database ([treegenesdb.org](http://treegenesdb.org)); and by  
511 sequence alignment against the NCBI non-redundant protein sequences database (nr) using  
512 BLASTP (Johnson *et al.*, 2008) with an e-value  $<1 \times 10^{-10}$ . BCFtools was used to merge vcfs files  
513 of individuals for further analysis (Danecek *et al.*, 2011).

514

515 *Phenotypic traits*

516 For each species, we measured ten traits related to drought tolerance (Table 1) in one branch from  
517 each of three individuals per genotype. The set of available individuals from each genotype were  
518 distributed randomly throughout the greenhouse; sampling was performed haphazardly, in that we  
519 sampled the first three individuals encountered for each genotype. In some cases, this required  
520 exhaustive searching due to poor survival of some genotypes; in other genotypes, many individuals  
521 were present. Each branch was sampled in early June 2020 using sharp secateurs and immediately  
522 placed in a ziploc bag and sprayed with water. The bag was then sealed and placed in a cooler with  
523 ice to prevent further water loss. Upon return to the laboratory, each branch was recut under water  
524 ( $\geq 1.5$  cm), the cut end was placed into a 50-mL falcon tube, and the tube was placed into a stand  
525 to allow the branch to rehydrate for 38 – 46 hours. After rehydration, three leaves were removed  
526 from each branch and stored in FAA for later anatomical measurements, and the branch was  
527 immediately returned to a sealed ziploc bag that had been sprayed internally with water. These  
528 bags were stored in a refrigerator until completion of measurement of shoot mass per unit area and  
529 subsampling for osmotic pressure measurements and stomatal density mounts were completed.  
530 Three values (or, in a few cases, two) for each trait measurement were thus collected for each  
531 genotype, and subsequent analysis was performed on the mean of these three values. Methods for  
532 each trait measurement are described below.

533

534 *Shoot mass per unit area.* Each branch was removed from the refrigerator and its sealed bag, and  
535 a small, representative section was returned to the bag and refrigerator for subsequent  
536 measurements of osmotic pressure and stomatal density. The rest of the branch was dabbed dry  
537 with paper towels and placed on a scanner (Canon TR8520), scanned for later measurement of  
538 shoot silhouette area (including both leaves and the shoots to which they were attached) in ImageJ,

539 placed into a labelled paper envelope, and placed in a drying oven at 70 °C until weight stopped  
540 declining (generally ~24 h). These dried samples were later weighed on a 5-point digital balance  
541 (Mettler-Toledo model XS225DU). Shoot mass per unit area was computed as the ratio of dry  
542 mass to initial (fresh) silhouette area.

543  
544 *Stomatal density.* For SESE, three leaves from each branch were excised and mounted abaxial side  
545 down in fingernail polish on a microscope slide. The number of stomata in a single image frame  
546 at a magnification of 200x was counted for each leaf and divided by the frame size (0.255742  
547 mm<sup>2</sup>) to calculate stomatal density. Results are presented as the mean ± SE among leaves. Stomatal  
548 density was not measured for SEGI.

549  
550 *Osmotic pressure at full turgor.* For each branch, a 6-mm long section of a previously rehydrated  
551 leaf (SESE) or branch (SEGI) was excised with a fresh razor blade and immediately enclosed in  
552 the sample well of a C-52 thermocouple psychrometer (Wescor, Logan, UT). The psychrometer  
553 was then placed in an insulated box and allowed to equilibrate. Every hour, a CR6 datalogger  
554 (Campbell Scientific, Logan, UT) was used to initiate a 10-s cooling curve for each psychrometer,  
555 psychrometer output (μV) was recorded every second, and the average μV output between 2 and  
556 5 seconds after the end of cooling was calculated. The resulting means were found to remain stable  
557 between 4 and 9 hours of equilibration; values from either 5 or 6 hours were used for subsequent  
558 analysis. Each psychrometer was calibrated using five KCl solutions, with osmotic pressures of 0,  
559 0.5, 1.0, 2.0, and 3.0 MPa, with 0.025 mL of each solution placed on a filter paper disk in the  
560 psychrometer sample well and otherwise measured as described earlier for leaves.

561



562 *Elemental and isotopic analyses.* A dried sample of leaf (SESE) or branch (SEGI) material was  
563 placed in a sealed cuvette with three stainless steel spherical pellets and ground in a ball mill for  
564 two minutes. Subsamples (1.9 – 4.6 mg) were weighed and transferred into tin capsules, placed  
565 into 96-well trays, and crushed to seal the capsules.  $\delta^{13}\text{C}$  (relative to Vienna Pee Dee Belemnite  
566 standard) and total C and N were measured at the UC Davis Stable Isotope Facility using a PDZ  
567 Europa ANCA-GSL elemental analyzer interfaced to a PDZ Europa 20-20 isotope ratio mass  
568 spectrometer (Sercon Ltd., Cheshire, UK), with several replicates of at least four laboratory  
569 reference standards periodically interspersed for internal calibration. C:N ratio ( $\text{mol mol}^{-1}$ ) was  
570 calculated by dividing total C by total N.

571  
572 *Leaf vascular anatomy.* Leaves previously stored in FAA as described earlier were hand-sectioned,  
573 mounted on a slide, and digitally imaged at 400x magnification, centered on the single leaf vein,  
574 and four traits were measured using ImageJ: (i) the total cross-sectional area of transfusion tissue  
575 laterally abutting the single leaf vein, (ii) the total cross-sectional area occupied by xylem, (iii) the  
576 hydraulic mean diameter (calculated following Kolb and Sperry 1999 as  $\text{HD} = \Sigma D^5 / \Sigma D^4$ , where  $D$   
577 is conduit diameter and the sum is taken over 10 conduits;  $D$  was calculated from conduit lumen  
578 area  $[A]$  as  $D = [4A/\pi]^{0.5}$ ), and (iv) the total area of central fibers, when present (longitudinal fibers  
579 with thick, concentrically lamellated cell walls located adjacent to the adaxial side of the xylem,  
580 and are thought to contribute to water transport). Central fibers were not observed in SEGI. As for  
581 all other traits, measurements were repeated for three leaves per genotype, each taken from a  
582 different ramet.

583

584 *Correlations among drought-related traits, geographic and environmental variables*

585 Physiological parameters depend on relationships among traits and their composite effects on leaf  
586 function; thus, we evaluated geo-climatic clustering within the collective phenotypic trait-space  
587 observed in the common garden. We also tested and plotted correlations among the nine drought-  
588 related traits (Table 1) and geographical and environmental variables for both SEGI and SESE  
589 using R packages Hmisc and ggcorrplot in R studio 1.1.442. Geographic variables (latitude,  
590 longitude and elevation) representing the geographic origin of the sampled trees (collected directly  
591 for SESE individuals, or using the centroid of the grove polygon for SEGI) were used as  
592 geographic origin to obtain environmental data from public databases such as WorldClim2.0 (Fick  
593 and Hijmans, 2017) and ClimateNA (Wang *et al.*, 2016).

594  
595 All 83 SESE genotypes were ordinated in Euclidean trait-space with PCA, using a correlation  
596 matrix and eight of nine traits, excluding only C:N because of univariate nonlinear relationships  
597 with other traits. A similar analysis was repeated unsuccessfully for SEGI, which did not have any  
598 geographic or climatic associations with PCA axes. Giant sequoia had only five traits suitable for  
599 PCA, giving less dimensionality to explore, and samples came from far fewer groves which were  
600 sampled unevenly. Grove-level clusters were apparent in the trait-space, but our sample size did  
601 not permit analysis on that level. The eight SESE traits used had a mean skewness of 0.366 and a  
602 mean kurtosis of 0.596. None of the climatic or geographic variables had strong correlations with  
603 individual axes; however, the cumulative association of rainfall-related variables and latitude were  
604  $> R^2 = 0.3$ . We selected mean annual precipitation and latitude to create two sets of potential  
605 clusters within the trait-space, selecting three groups from each, with the highest and lowest values  
606 forming two groups, and the intermediate values forming a larger, third class. For latitude we  
607 called genotypes from above 40° latitude “north” ( $N = 23$ ), those from latitudes below 37.5°

608 “south” ( $N = 19$ ), and intermediate zones “central” ( $N = 41$ ). Categories for rainfall were “wet” if  
609 sampling sites received more than 1600 mm of annual precipitation ( $N = 19$ ), those from locations  
610 with fewer than 900 mm of precipitation “dry” ( $N = 16$ ), and “intermediate rainfall” ( $N = 48$ ). With  
611 the first five PCA axes, retaining 78% of the total trait variation, we found the 5-dimensional  
612 “phenotypic volumes” as minimum convex hulls occupied by each potential latitudinal or rainfall  
613 class, and estimated their intersection and union using the R package hypervolume.

614

#### 615 *Genotype data preparation*

616 Raw genotyping data containing high levels of missing data were filtered using TASSEL v.5.2.72  
617 (Bradbury *et al.*, 2007) with the following parameters: minor allele frequency ( $maf$ ) = 0.05,  
618 maximum allele frequency ( $max\text{-}maf$ ) = 0.9. The minimum count—the minimum number of taxa  
619 in which the site must have been scored to be included in the filtered data set, 50 was implemented  
620 for SEGI and 30 for SESE.

621

#### 622 *Genome-wide association study*

623 Associations between each drought-related trait and individual marker were tested using a general  
624 linear model (GLM) and a mixed linear model (MLM) implemented in the GWAS analysis in  
625 TASSEL v.5.2.72 (Bradbury *et al.*, 2007). A kinship matrix and Principal Component Analysis  
626 (PCA) were calculated for the mixed linear model (MLM) analysis (Yu *et al.*, 2006). Population  
627 structure was accounted by including principal components as co-variates in the models.  
628 Relatedness among individuals was also accounted for incorporating a kinship matrix in the  
629 models. Effect sizes (proportion of phenotypic variance explained by the marker) and the  
630 dominance and additive effects were also calculated in TASSEL.

631  
632 In addition, univariate linear mixed models (uLMM) and multivariate linear mixed models  
633 (mvLMM) GWAS were performed in GEMMA v0.98.3 (Zhou and Stephens 2012; 2014). In  
634 contrast to the uLMM method, mvLMM associates multiple phenotypic traits with all markers  
635 simultaneously, while controlling for population structure and relatedness. To run GEMMA,  
636 PLINK binary ped format was generated using PLINK v.1.9 software for association analysis. The  
637 Bonferroni threshold ( $<0.05$ ) correction and false discovery rate (FDR) were applied for multiple  
638 correction to identify significant SNPs. Manhattan plots of  $-\log_{10}(P)$  values for each SNPs versus  
639 chromosomal positions were generated at the GLM of TASSEL and uLMM and mvLMM of  
640 GEMMA results.

641  
642 *Functional gene annotations*  
643 The genomic positions of the significant SNPs were investigated to identify the annotated genes  
644 by scanning the genomic VCF files of SEGI and SESE. Subsequently, the identified significant  
645 SNPs were annotated using annotation files downloaded from TreeGenes  
646 (<https://treegenesdb.org/TripalContactProfile/588450>). The annotation was confirmed using some  
647 other approaches such as pfam (Finn *et al.*, 2014) and blastp (Johnson *et al.*, 2008), BlastKOALA  
648 (Kanehisa *et al.*, 2016). The Pfam was ran using the HMMER (Finn *et al.*, 2011) at default  
649 parameters with e-value 1.0 to search proteins families. The blastp was ran at expected threshold-  
650 0.05; matrix-BLOSUM 62; database- non-redundant protein sequence (nr) to search the similar  
651 hits. The BlastKOALA at KEGG (Kanehisa *et al.*, 2016) was performed for protein pathways and  
652 annotations. The identical matching genes were chosen to identify annotations and KEGG  
653 pathways.

654

## 655 **DATA AVAILABILITY STATEMENT**

656 Sequencing raw reads are deposited in the NCBI SRA (<https://www.ncbi.nlm.nih.gov/sra>) under  
657 BioSample SUB10142549.

658

## 659 **ACKNOWLEDGEMENTS**

660 The authors would like to thank Emily Burns for her guidance and expertise on early stages of  
661 the project, Bill Libby for help on collection design, and Bill Werner for help with greenhouse  
662 support and propagation. TNB thanks Zane Moore for providing measurements of stomatal  
663 density in SESE, and Oliver Betz for producing micrographs of leaf cross sections in SESE and  
664 SEGI. This project was supported by a grant from Save The Redwoods League for the Redwood  
665 Genome Project (to DN). ARDLT was supported by NIFA grant ARZZ19-0258. TNB was  
666 supported by the National Science foundation (Awards #1557906 and 1951244) and the USDA  
667 National Institute of Food and Agriculture (Hatch project 1016439 and Award no. 2020-67013-  
668 30913).

669

## 670 **CONFLICT OF INTEREST**

671 The authors declare there are no conflict of interests.

672

## 673 **AUTHOR CONTRIBUTIONS**

674 DN, ARDLT, TNB and AS designed the study; AS established the common gardens; TNB, AS,  
675 and AROC planned the trait measurement; TNB measured all drought-related traits; BA and AS  
676 performed all genomic lab work; DP and SS did the SNP calling; MKS and ARDLT performed  
677 all genomic and bioinformatic data analyses; MKS, TNB, AROC and ARDLT wrote the  
678 manuscript; all authors reviewed the final version of the manuscript.

679

## 680 SUPPORTING INFORMATION

681

682 **Table S1.** SNP filtering in giant sequoia

683 **Table S2.** SNP filtering in coast redwood.

684 **Table S3.** Univariate GLM TASSEL GWAS results in coast redwood.

685 **Table S4.** Univariate GLM TASSEL GWAS results in giant sequoia.

686 **Table S5.** Univariate uLMM GEMMA GWAS results in coast redwood.

687 **Table S6.** Multitrait multivariate mvLMM GEMMA GWAS results in coast redwood.

688 **Table S7.** uLMM and mvLMM GEMMA results in giant sequoia.

689 **Figure S1.** Correlations among drought related traits, geographic and environmental variables in  
690 giant sequoia. R values are color-coded based on the figure legend.

691 **Figure S2.** Correlations among drought related traits, geographic and environmental variables in  
692 coast redwood. R values are color-coded based on the figure legend.

693 **Figure S3.** Manhattan plot of SNP markers generated by TASSEL using GLM for SEGI (a) for  
694 SESE (b). Each point represents a genetic variant in Manhattan plots. In the Manhattan plot y-axis  
695 represent the p-value of SNP markers in  $-\log_{10}$  and the x-axis is chromosomal positions.

696 **Figure S4.** Manhattan plot of SNP markers generated by GEMMA using univariate linear mixed  
697 model (uLMM) in SESE. (a) manhattan plot indicate the uLMM analysis with the phenotypic traits  
698 CN, (b) D13C, (c) D15N, (d) FA, (e) SMA, (f) PIFT, (g) SD, (h) TA, (i) HD, and (j) XA, in SESE.  
699 In the Manhattan plot y-axis represents the p-value of SNP markers in  $-\log_{10}$  and the x-axis is  
700 chromosomal positions. The red line represents genome-wide significant cut-off (p-value <  
701  $9.00E10^{-6}$ ). The green dot over the genome-wide significant cut-off (red line) represents the  
702 significant SNPs (p-value <  $9.00E10^{-6}$ ).

703 **Figure S5.** Manhattan plot of SNP markers generated by GEMMA using univariate linear mixed  
704 model (uLMM) in SEGI. (a-h) Manhattan plot indicate the uLMM analysis with the phenotypic  
705 traits (a) TA, (b) CN, (c) D13C, (d) D15N, (e) SMA, (f) PIFT, (g) HD, and (h) XA, in SEGI. In  
706 the Manhattan plot y-axis represent the p-value of SNP markers in  $-\log_{10}$  and the x-axis is  
707 chromosomal positions. The red line represents genome-wide significant cut-off (p-value<  
708  $6.00E10^{-7}$ ). The green dot over the genome-wide significant cut-off (red line) represents the  
709 significant SNPs (p-value<  $6.00E10^{-7}$ ).

710

711

712

713

714

## 715 REFERENCES

716

717 Adams, H. D., Zeppel, M. J., Anderegg, W. R., Hartmann, H., Landhäusser, S. M., Tissue, D. T.,  
718 et al (2017) A multi-species synthesis of physiological mechanisms in drought-induced  
719 tree mortality. *Nat. Ecol. Evol*, 1(9), 1285-1291.

720

721 Adams, H.D., and Kolb, T.E. (2005) Tree growth response to drought and temperature along an  
722 elevation gradient on a mountain landscape. *J. Biogeogr.*, 32, 1629-1640.

723

- 724 Allen, C.D., Macalady, A.K., Chenchouni, H., Bachelet, D., McDowell, N., Vennetier, M.,  
725 Kitzberger, T., Rigling, A., Breshears, D.D., Hogg, E.T. Gonzalez, P. (2010) A global  
726 overview of drought and heat-induced tree mortality reveals emerging climate change risks for  
727 forests. *For. Ecol. Manag.*, 259(4), 660-684.  
728
- 729 Ambrose, A.R., Baxter, W.L., Wong, C.S., Burgess, S.S.O., Williams, C.B., Næsberg, R.R.,  
730 Koch, G.W., Dawson, T.E. (2016) Hydraulic constraints modify optimal photosynthetic  
731 profiles in giant sequoia trees. *Oecologia*, 182, 713-730  
732
- 733 Ambrose, A.R., Baxter, W.L., Wong, C.S., Næsberg, R.R., Williams, C.B., Dawson T.E. (2015)  
734 Contrasting drought-response strategies in California redwoods. *Tree Physiol*, 35, 453-469  
735
- 736 Baison, J., Zhou, L., Forsberg, N. *et al.* (2020). Genetic control of tracheid properties in Norway  
737 spruce wood. *Sci Rep*, 10, 18089. <https://doi.org/10.1038/s41598-020-72586-3>  
738
- 739 Bellard, C., Bertelsmeier, C., Leadley, P., Thuiller, W., and Courchamp, F. (2012). Impacts of  
740 climate change on the future of biodiversity. *Ecol Lett*, 15, 365-377.  
741
- 742 Bradbury, P. J., Zhang, Z., Kroon, D.E., Casstevens, T.M., Ramdoss, Y., Buckler, E.S. (2007)  
743 TASSEL: software for association mapping of complex traits in diverse samples.  
744 *Bioinformatics*, 23 (19), 2633-5, doi: 10.1093/bioinformatics/btm308.  
745
- 746 Breidenbach N, Gailing O, Krutovsky KV (2020) Genetic structure of coast redwood (*Sequoia*  
747 *sempervirens* [D. Don] Endl.) populations in and outside of the natural distribution range  
748 based on nuclear and chloroplast microsatellite markers. *PLOS ONE*, 15(12),  
749 e0243556. <https://doi.org/10.1371/journal.pone.0243556>
- 750 Brodribb, T.J., Field, T.S., Jordan, G.J (2007) Leaf maximum photosynthetic rate and venation are  
751 linked by hydraulics. *Plant Physiol*, 144, 1890–1898  
752
- 753 Burns, E. E., Campbell, R., and Cowan, P. D. (2018). State of Redwoods Conservation Report: A  
754 Tale of Two Forests, Coast Redwoods, Giant Sequoia. *Save the Redwoods League, San*  
755 *Francisco CA USA*.  
756
- 757 Chen, ZQ., Zan, Y., Milesi, P. *et al.* Leveraging breeding programs and genomic data in Norway  
758 spruce (*Picea abies* L. Karst) for GWAS analysis. *Genome Biol* 22, 179 (2021).  
759 <https://doi.org/10.1186/s13059-021-02392-1>  
760
- 761 Chin, A.R. and Sillett, S.C. (2016) Phenotypic plasticity of leaves enhances water-stress tolerance  
762 and promotes hydraulic conductivity in a tall conifer. *Am. J. Bot.*, 103, 796-807  
763
- 764 Chin, A.R. and Sillett, S.C. (2019). Within-crown plasticity in leaf traits among the tallest conifers.  
765 *Am. J. Bot.*, 106(2), 174-186.  
766
- 767 Collins, T., Stone, J. R., Williams, A.J (2001). All in the family: the BTB/POZ, KRAB, and SCAN  
768 domains. *Mol. Cell. Biol.*, 21 (11), 3609-3615, doi:10.1128/Mcb.21.11.3609-3615.2001.



- 769  
770 Cumbie, W. P., Eckert, A., Wegrzyn, J., Whetten, R., Neale, D., and Goldfarb, B. (2011).  
771 Association genetics of carbon isotope discrimination, height and foliar nitrogen in a  
772 natural population of *Pinus taeda* L. *Heredity*, 107, 105-114.  
773
- 774 Danecek, P., Auton, A., Abecasis, G., Albers, C.A., Banks, E., DePristo, M.A., Handsaker, R.E.,  
775 Lunter, G., Marth, G.T., Sherry, S.T., McVean, G., Durbin, R and 1000 Genomes Project  
776 Anal Grp. (2011) The variant call format and VCFtools. *Bioinformatics*, 27 (15), 2156-  
777 2158, doi: 10.1093/bioinformatics/btr330.  
778
- 779 De La Torre, A.R., Birol, I., Bousquet, J., Ingvarsson, P.K., Jansson, S., Jones, S.J.M., Keeling,  
780 C.I., MacKay, J., Nilsson, O., Ritland, K., Street, N., Yanchuk, A., Zerbe, P., Bohlmann,  
781 J. (2014) Insights into Conifer Giga-genomes. *Plant Physiol*, 166, 1-9.  
782
- 783 De La Torre, A.R., Wilhite, B., Puiu, D., St. Clair, J.B., Crepeau, M.W., Salzberg, S.L., Langley,  
784 C.H., Allen, B., Neale, D.B. (2021a) Dissecting the polygenic basis of cold adaptation  
785 using genome-wide association of traits and environmental data in Douglas-fir. *Genes*,  
786 12:110, doi:10.3390/genes12010110.  
787
- 788 De La Torre, A.R., Sekhwal, M.K., Neale, D.B. (2021b). Selective sweeps and polygenic  
789 adaptation drive local adaptation along moisture and temperature gradients in natural  
790 populations of coast redwood and giant sequoia. *Genes*. In review  
791
- 792 Depardieu, C., Gérardi, S., Nadeau, S., Parent, G.J., Mackay, J., Lenz, P., Lamothe, M., Girardin,  
793 M.P., Bousquet, J. and Isabel, N. (2021), Connecting tree-ring phenotypes, genetic  
794 associations and transcriptomics to decipher the genomic architecture of drought  
795 adaptation in a widespread conifer. *Mol Ecol*, 30: 3898-  
796 3917. <https://doi.org/10.1111/mec.15846>  
797
- 798
- 799 Dodd, R.S. and DeSilva, R. (2016) Long-term demographic decline and late glacial divergence  
800 in a Californian paleoendemic: *Sequoiadendron giganteum* (giant sequoia). *Ecol Evol*, 6,  
801 3342-3355. <https://doi.org/10.1002/ece3.2122>  
802
- 803 Eckert, A.J., van Heerwaarden, J., Wegrzyn, J.L., Nelson, C.D., Ross-Ibarra, J., González-  
804 Martínez, S.C., Neale, D.B. (2010) Patterns of Population Structure and Environmental  
805 Associations to Aridity Across the Range of Loblolly Pine (*Pinus taeda* L.,  
806 Pinaceae), *Genetics*, Volume 185, Issue 3, 1 July 2010, Pages 969–  
807 982, <https://doi.org/10.1534/genetics.110.115543>  
808
- 809 Elfstrand, M., Baison, J., Lundén, K., et al. (2020) Association genetics identifies a specifically  
810 regulated Norway spruce laccase gene, *PaLAC5*, linked to *Heterobasidion*  
811 *parviporum* resistance. *Plant Cell Environ*, 43, 1779– 1791. <https://doi.org/10.1111/pce.13768>  
812  
813



- 814 Farjon, A., and Schmid, R. (2013). *Sequoia sempervirens*. The IUCN Red List of Threatened  
815 Species., e.T34051A2841558.  
816
- 817 Fettig, C. J., Mortenson, L. A., Bulaon, B. M., Foulk, P. B. (2019). Tree mortality following  
818 drought in the central and southern Sierra Nevada, California, US. *For Ecol Manag*, 432,  
819 164-178.  
820
- 821 Fick, S.E. and Hijmans, R.J. (2017), WorldClim 2: new 1-km spatial resolution climate surfaces  
822 for global land areas. *Int. J. Climatol*, 37, 4302-4315. <https://doi.org/10.1002/joc.5086>  
823
- 824 Finn, R. D., Bateman, A., Clements, J., Coggill, P., Eberhardt, R.Y., Eddy, S.R., Heger, A.,  
825 Hetherington, K., Holm, L., Mistry, J., Sonnhammer, E.L., Tate, J., Punta, M. (2014)  
826 Pfam: the protein families database. *Nucleic Acids Res*, 42 (Database issue), D222-30, doi:  
827 10.1093/nar/gkt1223.  
828
- 829 Finn, R. D., Clements, J., Eddy, S.R. (2011) HMMER web server: interactive sequence similarity  
830 searching." *Nucleic Acids Res*, 39 (Web Server issue), W29-37, doi: 10.1093/nar/gkr367.  
831
- 832 Gaylord, M.L., Kolb, T.E., Pockman, W.T., Plaut, J.A., Yepez, E.A., Macalady, A.K., Pangle,  
833 R.E., McDowell, N.G. (2013) Drought predisposes piñon-juniper woodlands to insect  
834 attacks and mortality. *New Phytol*, 198(2), 567-578.  
835
- 836 Gonzalez-Martinez, S. C., Huber, D., Ersoz, E., Davis, J. M., Neale, D. B. (2008). Association  
837 genetics in *Pinus taeda* L. II. Carbon isotope discrimination. *Heredity*, 101, 19-26.  
838
- 839 Kolb, K. J. and Sperry, J. S. (1999). Differences in drought adaptation between subspecies of  
840 sagebrush (*Artemisia tridentata*). *Ecology*, 80(7), 2373-2384.  
841
- 842 Kuser, J.E., Bailly, A., Franclet, A., Libby, W.J., Rydelius, J., Schoenike, R., Vagle, N (1995)  
843 Early results of a range wide provenance test of *Sequoia sempervirens*. *For Genet Resour*,  
844 23, 21-25  
845
- 846 Harvey, H.T., Shellhammer, H.S., Stecker, R.E. (1980) *Giant sequoia ecology*. Science  
847 Monograph Series 12. US Department of the Interior, National Park Service, Washington,  
848 DC.  
849
- 850 Hicke, J.A., Meddens, A.J.H., Kolden, C.A. (2015) Recent tree mortality in the western United  
851 States from bark Beetles and forest fires. *For Scie*, 62(2),141-153  
852
- 853 Ishii, H.R., Azuma, W., Kuroda, K. and Sillett, S.C. (2014) Pushing the limits to tree height: could  
854 foliar water storage compensate for hydraulic constraints in *Sequoia sempervirens*?. *Funct.*  
855 *Ecol*, 28(5), 1087-1093.  
856
- 857 Jactel, H., Petit, J., Desprez-Loustau, M., Delzon, S., Piou, D., Battisti, A., Koricheva, J. (2012)  
858 Drought effects on damage by forest insects and pathogens: a meta-analysis. *Glob. Change*  
859 *Biol*, 18(1), 267-276.

- 860  
861 Johnson, M., Zaretskaya, I., Raytselis, Y., Merezhuk, Y., McGinnis, S., Madden, T.L. (2008)  
862 NCBI BLAST: a better web interface. *Nucleic Acids Res*, 36 (Web Server issue), W5-9,  
863 doi: 10.1093/nar/gkn201.  
864  
865 Kanehisa, M., Sato, Y., Kawashima, M., Furumichi, M., Tanabe, M. (2016) KEGG as a reference  
866 resource for gene and protein annotation. *Nucleic Acids Res*, 44 (D1), D457-D462, doi:  
867 10.1093/nar/gkv1070.  
868  
869 Kanehisa, M., Sato, Y., Morishima, K. (2016). BlastKOALA and GhostKOALA: KEGG Tools  
870 for Functional Characterization of Genome and Metagenome Sequences. *J Mol Biol*, 428,  
871 (4):726-731, doi: 10.1016/j.jmb.2015.11.006.  
872  
873 Langmead, B. and S. L. Salzberg. (2012) Fast gapped-read alignment with Bowtie 2. *Nat Methods*,  
874 9 (4), 357-9, doi: 10.1038/nmeth.1923.  
875  
876 Lee, D. S., Kim, Y.C., Kwon, C.J., Ryu, C.M., Park, O.K. (2017) The Arabidopsis Cysteine-Rich  
877 Receptor-Like Kinase CRK36 Regulates Immunity through Interaction with the  
878 Cytoplasmic Kinase BIK1. *Front Plant Sci*, 8, doi: ARTN 1856  
879  
880 Li, H., Handsaker, B., Wysoker, A., Fennell, T., Ruan, J., Homer, N., Marth, G., Abecasis, G.,  
881 Durbin, R and Subgroup Genome Project Data Processing. (2009) The Sequence  
882 Alignment/Map format and SAMtools. *Bioinformatics*, 25, (16), 2078-9, doi:  
883 10.1093/bioinformatics/btp352.  
884  
885 Liu, R., Xu, H.R., Jiang, S.C., Lu, K., Lu, Y.F., Feng, X.J., Wu, Z., Liang, S., Yu, Y.T., Wang,  
886 X.F., Zhang, D.P. (2013) Light-harvesting chlorophyll a/b-binding proteins, positively  
887 involved in abscisic acid signalling, require a transcription repressor, WRKY40, to balance  
888 their function. *J. Exp. Bot.*, 64 (18), 5443-5456, doi: 10.1093/jxb/ert307.  
  
889 Lu, M., Krutovsky, K.V., Nelson, C.D., West, J.B., Reilly, N.A., Loopstra, C.A. (2017)  
890 Association genetics of growth and adaptive traits in loblolly pine (*Pinus taeda* L.) using  
891 whole-exome-discovered polymorphisms. *Tree Genet*, 13, 57.  
  
892 Luo, M., Dennis, E.S., Berger, F., Peacock, W.J., Chaudhury, A. (2005) MINISEED3 (MINI3), a  
893 WRKY family gene, and HAIKU2 (IKU2), a leucine-rich repeat (LRR) KINASE gene, are  
894 regulators of seed size in Arabidopsis. *Proc Natl Acad Sci U S A*, 102 (48), 17531-6, doi:  
895 10.1073/pnas.0508418102.  
896  
897 McCarthy, M. I., Abecasis, G. R., Cardon, L. R., Goldstein, D. B., Little, J., Ioannidis, J. P., and  
898 Hirschhorn, J. N. (2008). Genome-wide association studies for complex traits: consensus,  
899 uncertainty and challenges. *Nat Rev Genet*, 9, 356-69.  
900  
901 McGuire, A.L., Gabriel, S., Tishkoff, S.A. *et al.* (2020) The road ahead in genetics and  
902 genomics. *Nat. Rev. Genet.* 21, 581-596.  
903

- 904 McKenna, A., Hanna, M., Banks, E., Sivachenko, A., Cibulskis, K., Kernytsky, A., Garimella, K.,  
905 Altshuler, D., Gabriel, S., Daly, M., DePristo, M.A. (2010). The genome analysis toolkit:  
906 a MapReduce framework for analyzing next-generation DNA sequencing data. *Genome*  
907 *Res*, 20,1297-1303.  
908
- 909 Mitchell, R.M. and Bakker, J.D. (2014) Intraspecific trait variation driven by plasticity and  
910 ontogeny in *Hypochaeris radicata*. *PloS one*, 9(10), p.e109870.  
911
- 912 Moran, E., Lauder, J., Musser, C., Stathos, A., Shu, M. (2017) The genetics of drought tolerance  
913 in conifers. *New Phytol*, 216(4), 1034-1048.  
914
- 915 Murray, B. G., Leitch, I. J., Bennett, M. D. (2004). Gymnosperm DNA C-values database.  
916
- 917 Myles, S., Peiffer, J., Brown, P.J., Ersoz, E.S., Zhang, Z., Costich, D.E. and Buckler, E.S. (2009)  
918 Association mapping: critical considerations shift from genotyping to experimental  
919 design. *Plant Cell*. 21, 2194-2202.  
920
- 921 Neale, D.B., Zimin, A.V., Zaman, S., Scott, A.D., Shrestha, B., Workman, R.E., Puiu, D., Allen,  
922 B.J., Sekhwal, M.K., De La Torre, A.R., McGuire, P.E., Burns, E., Timp, W., Wegrzyn,  
923 J.L., Salzberg, S.L. (2021). Assembled and annotated 26.5 Gbp coast redwood genome: a  
924 resource for estimating evolutionary adaptive potential and investigating hexaploidy  
925 origin. *G3: Genes Genomes Genetics*. In press.  
926
- 927 Neale, D. B. and Savolainen, O. (2004). Association genetics of complex traits in conifers. *Trends*  
928 *Plant Sci*, 9, 325-30.  
929
- 930 Oldham, A.R., Sillett, S.C., Tomescu, A.M., Koch, G.W. (2010) The hydrostatic gradient, not light  
931 availability, drives height-related variation in *Sequoia sempervirens* (Cupressaceae) leaf  
932 anatomy. *Am. J. Bot*, 97(7), 1087-1097.  
933
- 934 Pittermann, J., Stuart, S.A., Dawson, T.E., Moreau, A. (2012) Cenozoic climate change shaped the  
935 evolutionary ecophysiology of the Cupressaceae conifers. *Proc Natl Acad Sci USA* 109:  
936 9647-9652.  
937
- 938 Pritchard, J.K., Stephens, M., Rosenberg, N.A. and Donnelly, P. (2000) Association mapping in  
939 structured populations. *Am. J. Hum. Genet.* 67, 170-181.  
940
- 941 Quinlan, A. R. and Hall, I.M. (2010) BEDTools: a flexible suite of utilities for comparing genomic  
942 features. *Bioinformatics*, 26 (6), 841-2, doi: 10.1093/bioinformatics/btq033.  
943
- 944 Razgour, O., Forester, B., Taggart, J. B., Bekaert, M., Juste, J., Ibanez, C., Puechmaille, S. J.,  
945 Novella-Fernandez, R., Alberdi, A., and Manel, S. (2019). Considering adaptive genetic  
946 variation in climate change vulnerability assessment reduces species range loss projections.  
947 *Proc Natl Acad Sci USA*, 116, 10418-10423.  
948

- 949 Sawyer JO; Sillett SC; Libby WJ et al. (2000) Redwood trees, communities, and ecosystems: a  
950 closer look. In: Noss RF (ed) *The redwood forest: history, ecology, and conservation of*  
951 *the coast redwoods*. Island Press, Washington, DC, 81–118.  
952
- 953 Scott, A.D., Zimin, A.V., Puiu, D., Workman, R., Britton, M., Zaman, S., Caballero, M.,  
954 Read, A.C., Bogdanove, A.J., Burns, E., Wegrzyn, J., Timp, W., Salzberg, S.L., Neale, D.B.  
955 (2020) Reference Genome Sequence for Giant Sequoia, *G3 GENES GENOM GENET*, 10  
956 (11), 3907–3919, <https://doi.org/10.1534/g3.120.401612>  
957
- 958 Sharma, B., Joshi, D., Yadav, P.K., Gupta, A.K., Bhatt, T.K. (2016) Role of Ubiquitin-Mediated  
959 Degradation System in Plant Biology. *Front Plant Sci*, 7:806, doi:  
960 10.3389/fpls.2016.00806.  
961
- 962 Shukla, P., Singh, N.K., Kumar, D., Vijayan, S., Ahmed, I., Kirti, P.B. (2014) Expression of a  
963 pathogen-induced cysteine protease (AdCP) in tapetum results in male sterility in  
964 transgenic tobacco. *Funct Integr Genomics*, 14 (2), 307-17, doi: 10.1007/s10142-014-  
965 0367-2.  
966
- 967 Sillett, S.C., Van Pelt, R., Carroll, A.L., Kramer, R.D., Ambrose, A.R., Trask, D.A. (2015) How  
968 do tree structure and old age affect growth potential of California redwoods?. *Ecol.*  
969 *Monogr.*, 85(2), 181-212.  
970
- 971 Stephenson, N. L., Das, A. J., Ampersee, N. J., Cahill, K. G., Caprio, A. C., Sanders, J. E.,  
972 Williams, A. P. (2018). Patterns and correlates of giant sequoia foliage dieback during  
973 California's 2012–2016 hotter drought. *For. Ecol. Manag*, 419, 268-278.  
974
- 975 Trujillo-Moya, C., George, J.P., Fluch, S., Geburek, T., Grabner, M., Karanitsch-Ackerl, S.,  
976 Konrad, H., Mayer, K., Sehr, E.M., Wischnitzki, E., Schueler, S. (2018) Drought  
977 Sensitivity of Norway Spruce at the Species' Warmest Fringe: Quantitative and Molecular  
978 Analysis Reveals High Genetic Variation Among and Within Provenances. *G3 GENES*  
979 *GENOM GENET*, 8 (4), 1225–1245, <https://doi.org/10.1534/g3.117.300524>  
980
- 981 Van Nuland, M.E., Vincent, J.B., Ware, I.M., Mueller, L.O., Bayliss, S.L., Beals, K.K.,  
982 Schweitzer, J.A., Bailey, J.K. (2020) Intraspecific trait variation across elevation predicts  
983 a widespread tree species' climate niche and range limits. *Ecol. Evol*, 10(9), pp.3856-3867.  
984
- 985 Van Wyk, S. G., Du Plessis, M., Cullis, C.A., Kunert, K.J., Vorster, B.J. (2014) Cysteine protease  
986 and cystatin expression and activity during soybean nodule development and senescence.  
987 *BMC Plant Biol*, 14:294, doi: 10.1186/s12870-014-0294-3.  
988
- 989 Wang, H., Chevalier, D., Larue, C., Cho, S.K., Walker, J.C. (2007) The Protein Phosphatases and  
990 Protein Kinases of *Arabidopsis thaliana*. *Arabidopsis Book* no. 5, e0106, doi:  
991 10.1199/tab.0106.  
992

- 993 Wang T, Hamann A, Spittlehouse D, Carroll C (2016) Locally Downscaled and Spatially  
994 Customizable Climate Data for Historical and Future Periods for North America. PLOS  
995 ONE 11(6): e0156720. <https://doi.org/10.1371/journal.pone.0156720>
- 996 Weiss, M., Sniezko, R., Puiu, D., Crepeau, M.W., Stevens, K., Salzberg, S.L., Langley, C.H.,  
997 Neale, D.B., De La Torre, A.R. (2020) Genomic basis of white pine blister rust quantitative  
998 disease resistance and its relationship with qualitative resistance. *Plant J*,  
999 *doi:10.1111/tpj.14928*.
- 1000
- 1001 Xu, F. Q. and H. W. Xue. (2019) The ubiquitin-proteasome system in plant responses to  
1002 environments. *Plant Cell Environ*, 42 (10), 2931-2944, doi: 10.1111/pce.13633.
- 1003
- 1004 Yu, J. M., Pressoir, G., Briggs, W.H., Bi, I.V., Yamasaki, M., Doebley, J.F., McMullen, M.D., et  
1005 al (2006) A unified mixed-model method for association mapping that accounts for  
1006 multiple levels of relatedness. *Nat. Genet.*, 38 (2), 203-208, doi: 10.1038/ng1702.
- 1007
- 1008 Zhang, C., Gao, H., Li, R., Han, D., Wang, L., Wu, J., Xu, P., Zhang, S. (2019) GmBTB/POZ, a  
1009 novel BTB/POZ domain-containing nuclear protein, positively regulates the response of  
1010 soybean to *Phytophthora sojae* infection. *Mol Plant Pathol*, 20 (1), 78-91, doi:  
1011 10.1111/mpp.12741.
- 1012
- 1013 Zhou, S. M., Kong, X.Z., Kang, H.H., Sun, X.D., Wang, W. (2015) The involvement of wheat F-  
1014 box protein gene TaFBA1 in the oxidative stress tolerance of plants. *PLoS One*, 10 (4),  
1015 e0122117, doi: 10.1371/journal.pone.0122117.
- 1016
- 1017 Zhou, X. and M. Stephens. (2012) Genome-wide efficient mixed-model analysis for association  
1018 studies. *Nat. Genet*, 44, 821-824.
- 1019
- 1020 Zhou, X. and M. Stephens. (2014) Efficient multivariate linear mixed model algorithms for  
1021 genome-wide association studies. *Nat. Methods*, 11, 407-409.
- 1022
- 1023 Zou, Z., Huang, Q., Xie, G., Yang, L. (2018) Genome-wide comparative analysis of papain-like  
1024 cysteine protease family genes in castor bean and physic nut. *Sci Rep*, 8 (1), 331, doi:  
1025 10.1038/s41598-017-18760-6.
- 1026
- 1027
- 1028

1029 **Table 1.** Drought-related traits measured in this study in giant sequoia (SEGI) and coast redwood (SESE).

1030  
1031

| <b>Trait</b>                           | <b>Symbol</b> | <b>Units</b>      |
|----------------------------------------|---------------|-------------------|
| Shoot mass per area                    | SMA           | g m <sup>-2</sup> |
| Osmotic pressure at full turgor        | PIFT          | MPa               |
| C:N ratio                              | CN            | unitless          |
| Stable carbon isotope discrimination   | D13C          | permille          |
| Stable nitrogen isotope discrimination | D15N          | permille          |
| Stomatal density                       | SD            | mm <sup>-2</sup>  |
| Total area of transfusion tissue       | TA            | μm <sup>2</sup>   |
| Total area of xylem                    | XA            | μm <sup>2</sup>   |
| Total area of central fibers           | FA            | μm <sup>2</sup>   |
| Xylem hydraulic diameter               | HD            | μm                |

1032

1033 **Table 2.** Functional annotation of the genes of significant SNPs identified by GLM at TASSEL and univariate, multivariate linear mixed models at GEMMA for  
 1034 SESE and SEGI. Analysis column indicates the analysis methods (GLM, uLMM, mvLMM) for finding significant SNPs associated with different phenotypic  
 1035 traits in SEGI and SESE. Similar search ID column indicates the genbank or uniprot ID identified by similar BLAST hits. Genes associated with environmental  
 1036 variables in a previous GEA study show the environmental variable in parentheses.

| Analysis      | Gene                           | Similar Search ID <sup>a</sup> | SNPs <sup>b</sup> | p-value  | Annotation Description                                                        | KEGG Pathway                                               |
|---------------|--------------------------------|--------------------------------|-------------------|----------|-------------------------------------------------------------------------------|------------------------------------------------------------|
| GT            | SESE_010495 <sup>+</sup>       | XP_024365529.1                 | 1                 | 2.00E-07 | F-box protein                                                                 | Ubiquitin system                                           |
| GT            | SESE_022882 <sup>+</sup>       | XP_024520340.1                 | 1                 | 3.00E-07 | Uncharacterized protein                                                       | Cationic antimicrobial peptide (CAMP) resistance           |
| GT            | SESE_025289 <sup>+</sup>       | -                              | 1                 | 6.00E-07 | -                                                                             | -                                                          |
| GT            | SESE_026053 <sup>+</sup>       | XP_006840991.3                 | 4                 | 3.00E-07 | Motile sperm domain-containing protein                                        | -                                                          |
| GU,<br>GM, GT | SESE_026278 <sup>+</sup>       | XP_006847025.2                 | 1                 | 1.00E-07 | BTB/POZ domain-containing protein                                             | Hedgehog signaling pathway                                 |
| GT            | SESE_028233 <sup>+</sup> (MAT) | XP_010255566.1                 | 1                 | 0.00E+00 | Protein HOTHEAD-like                                                          | Glycine, serine and threonine metabolism                   |
| GT            | SESE_031915 <sup>+</sup> (MAT) | XP_027156177.1                 | 1                 | 7.00E-07 | Uncharacterized protein                                                       | -                                                          |
| GT            | SESE_035946 <sup>+</sup>       | ATG29933.1                     | 1                 | 1.00E-07 | Cyp750c18                                                                     | Cytochrome                                                 |
| GU,<br>GM, GT | SESE_039821 <sup>+</sup>       | XP_012445484.1                 | 21                | 2.00E-07 | Receptor-like protein kinase HAIKU2                                           | -                                                          |
| GT            | SESE_041334 <sup>+</sup>       | XP_020251916.1                 | 1                 | 8.00E-07 | Uncharacterized protein                                                       | -                                                          |
| GT            | SESE_058034 <sup>+</sup> (CMD) | XP_011625611.2                 | 1                 | 0.00E+00 | Cysteine-rich receptor-like protein kinase                                    | -                                                          |
| GT            | SESE_074679 <sup>+</sup>       | ABR17724.1                     | 1                 | 4.00E-07 | Unknown                                                                       | -                                                          |
| GT            | SESE_075160 <sup>+</sup>       | XP_006840304.2                 | 1                 | 2.00E-07 | Chlorophyll a-b binding protein                                               | Photosynthesis-antenna proteins, Metabolic pathways        |
| GT            | SESE_079577 <sup>+</sup> (MAP) | XP_007014626.2                 | 1                 | 8.00E-07 | Protein indeterminate domain                                                  | -                                                          |
| GT            | SESE_084919 <sup>+</sup>       | XP_017700156.2                 | 1                 | 2.00E-07 | Hypothetical protein                                                          | -                                                          |
| GT            | SESE_093724 <sup>+</sup>       | XP_006858242.1                 | 1                 | 1.00E-07 | Glyoxysomal processing protease                                               | -                                                          |
| GT            | SESE_102359 <sup>+</sup>       | XP_020532610.1                 | 1                 | 1.00E-06 | Lysosomal Pro-X carboxypeptidase                                              | Renin-angiotensin system, Protein digestion and absorption |
| GT            | SESE_118250 <sup>+</sup> (MAP) | XP_027064440.1                 | 1                 | 4.00E-07 | Uncharacterized protein                                                       |                                                            |
| GU,<br>GM, GT | SESE_121791 <sup>+</sup>       | XP_031476139.1                 | 4                 | 2.00E-07 | Cysteine protease RD19A-like                                                  | Lysosome, Apoptosis, Plant-pathogen interaction            |
| GM            | SESE_041833                    | XP_006838305.1                 | 1                 | 6.00E-06 | cellulose synthase A catalytic                                                | Transferases                                               |
| GM            | SESE_031320 <sup>+</sup> (MAP) | XP_027057309.1                 | 1                 | 4.00E-06 | uncharacterized protein                                                       | -                                                          |
| GT            | SEGI_21288 <sup>++</sup> (MAP) | XP_019108059.1                 | 1                 | 7.18E-07 | Uncharacterized protein                                                       | -                                                          |
| GM            | SEGI_29523                     | MBT3334041.1                   | 1                 | 3.20E-06 | 5-amino-6-(D-ribitylamino) uracil-L-tyrosine 4-hydroxyphenyl transferase-CofH | Methane metabolism, Metabolic pathways                     |

1037 GU= GEMMA univariate; GM= GEMMA multivariate; GT= GLM at TASSEL; <sup>+</sup>genes were associated with TA; <sup>++</sup> genes were associated with pift phenotype. <sup>a</sup>NCBI or Uniprot  
 1038 IDs; <sup>b</sup>Total Numbers of candidate SNPs in a gene.

1039 **Table 3.** Gene Ontology annotation of the genes of significant SNPs associated with different phenotypic traits in redwood (SESE) and giant  
 1040 sequoia (SEGI).

| Gene        | GO IDs                                                                                                         | GO Names                                                                                                                                                                                                                                                                                         |
|-------------|----------------------------------------------------------------------------------------------------------------|--------------------------------------------------------------------------------------------------------------------------------------------------------------------------------------------------------------------------------------------------------------------------------------------------|
| SESE_010495 | MP: GO:0005515                                                                                                 | MP: protein binding                                                                                                                                                                                                                                                                              |
| SESE_022882 | -                                                                                                              | -                                                                                                                                                                                                                                                                                                |
| SESE_026053 | -                                                                                                              | -                                                                                                                                                                                                                                                                                                |
| SESE_026278 | MP: GO:0005515                                                                                                 | MP: protein binding                                                                                                                                                                                                                                                                              |
| SESE_028233 | MP: GO:0016614; MP: GO:0050660                                                                                 | MP: oxidoreductase activity, acting on CH-OH group of donors; MP: flavin adenine dinucleotide binding                                                                                                                                                                                            |
| SESE_031915 | MP: GO:0003676                                                                                                 | MP: nucleic acid binding                                                                                                                                                                                                                                                                         |
| SESE_035946 | MP: GO:0004497; MP: GO:0005506; MF: GO:0016705; MP: GO:0020037                                                 | MP: monooxygenase activity; MP: iron ion binding; MP: oxidoreductase activity, acting on paired donors, with incorporation or reduction of molecular oxygen; MP: heme binding                                                                                                                    |
| SESE_039821 | BP: GO:0006468; MP: GO:0004672; MF: GO:0005524                                                                 | BP: protein phosphorylation; MP: protein kinase activity; MP: ATP binding                                                                                                                                                                                                                        |
| SESE_041334 | CC: GO:0016021                                                                                                 | CC: integral component of membrane                                                                                                                                                                                                                                                               |
| SESE_058034 | BP: GO:0006468; MP: GO:0004672; MP: GO:0005524                                                                 | BP: protein phosphorylation; MP: protein kinase activity; MP: ATP binding                                                                                                                                                                                                                        |
| SESE_074679 | CC: GO:0110165                                                                                                 | CC: cellular anatomical entity                                                                                                                                                                                                                                                                   |
| SESE_075160 | BP: GO:0009765; CC: GO:0016020                                                                                 | BP: photosynthesis, light harvesting; CC: membrane                                                                                                                                                                                                                                               |
| SESE_079577 | BP: GO:0009630; MP: GO:0046872; CC: GO:0005634                                                                 | BP: gravitropism; MP: metal ion binding; CC: nucleus                                                                                                                                                                                                                                             |
| SESE_084919 | -                                                                                                              | -                                                                                                                                                                                                                                                                                                |
| SESE_093724 | BP: GO:0016485; MP: GO:0004252; CC: GO:0005777                                                                 | BP: protein processing; MP: serine-type endopeptidase activity; CC: peroxisome                                                                                                                                                                                                                   |
| SESE_102359 | BP: GO:0006508; MP: GO:0008236                                                                                 | BP: proteolysis; MP: serine-type peptidase activity                                                                                                                                                                                                                                              |
| SESE_118250 | -                                                                                                              | -                                                                                                                                                                                                                                                                                                |
| SESE_121791 | BP: GO:0006508; MP: GO:0008234                                                                                 | BP: proteolysis; MP: cysteine-type peptidase activity                                                                                                                                                                                                                                            |
| SESE_041833 | BP: GO:0030244; MP: GO:0016760; CC: GO:0016020                                                                 | BP: cellulose biosynthetic process; MP: cellulose synthase (UDP-forming) activity; CC: membrane                                                                                                                                                                                                  |
| SESE_031320 | -                                                                                                              | -                                                                                                                                                                                                                                                                                                |
| SEGI_21288  | BP: GO:0006278; BP: GO:0090502; MP: GO:0003676; MP: GO:0003964; MP: GO:0004523                                 | BP: RNA-dependent DNA biosynthetic process; BP: RNA phosphodiester bond hydrolysis, endonucleolytic; MF: nucleic acid binding; MF: RNA-directed DNA polymerase activity; MF: RNA-DNA hybrid ribonuclease activity                                                                                |
| SEGI_29523  | MP: GO:0003824; MP: GO:0016740; MP: GO:0016765; MP: GO:0044689; MP: GO:0046872; MP: GO:0051536; MP: GO:0051539 | MP: catalytic activity; MP: transferase activity; MP: transferase activity, transferring alkyl or aryl (other than methyl) groups; MP: 7,8-didemethyl-8-hydroxy-5-deazariboflavin synthase activity; MP: metal ion binding; MP: iron-sulfur cluster binding; MP:4 iron, 4 sulfur cluster binding |

1041 BP=biological process; MP=molecular process; CC=cellular component



1042 **FIGURES**

1043  
1044  
1045  
1046  
1047

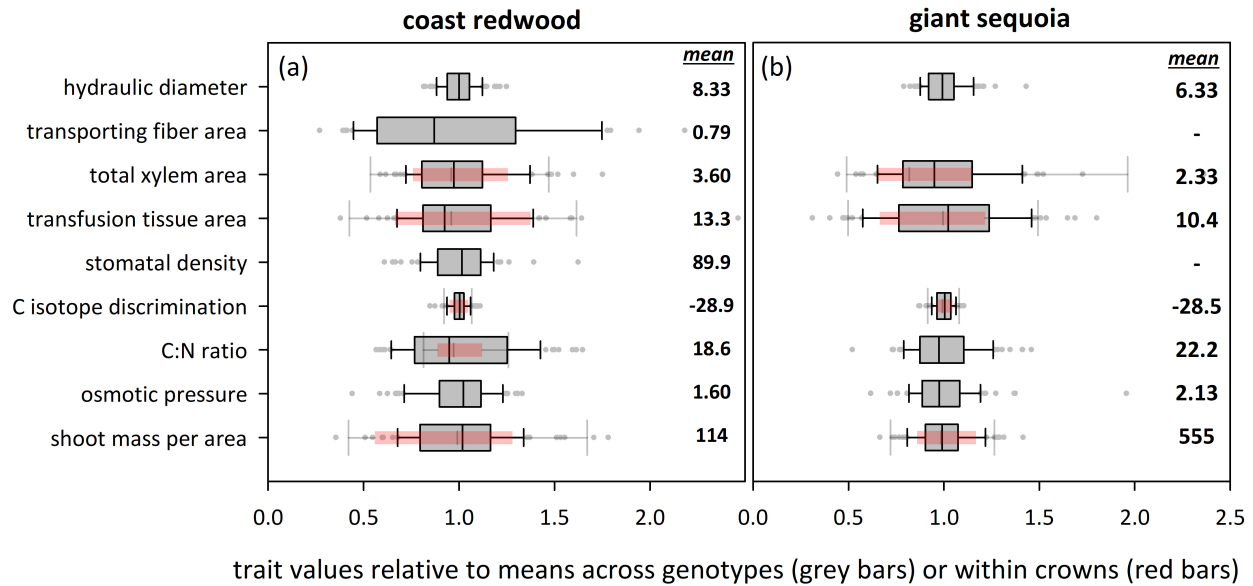

1048  
1049  
1050  
1051  
1052

1053 **Figure 1.** Phenotypic variability in drought-related traits across populations of climatically diverse  
1054 origin is similar to or smaller than phenotypic plasticity within individual tree crowns. Grey bars  
1055 indicate variation (interquartile range) across genotypes examined in this study, for (a) coast  
1056 redwood, and (b) giant sequoia; red bars indicate variation within crowns of single trees examined  
1057 by Chin & Sillett (2016) and Oldham et al. (2010). The vertical line in each grey bar denotes the  
1058 median, whiskers denote 5th and 95th percentiles, and grey symbols are outliers. Trait values are  
1059 expressed relative to mean values across genotypes (grey bars) or within crowns (red bars). Mean  
1060 values across genotypes for each trait are shown at right in each panel (units as in Table 1; for  
1061 areas of transporting fibers, xylem and transfusion tissue, multiply values shown here by  $10^3$  to  
1062 get areas in  $\mu\text{m}^2$ ).

1063  
1064  
1065  
1066  
1067  
1068  
1069

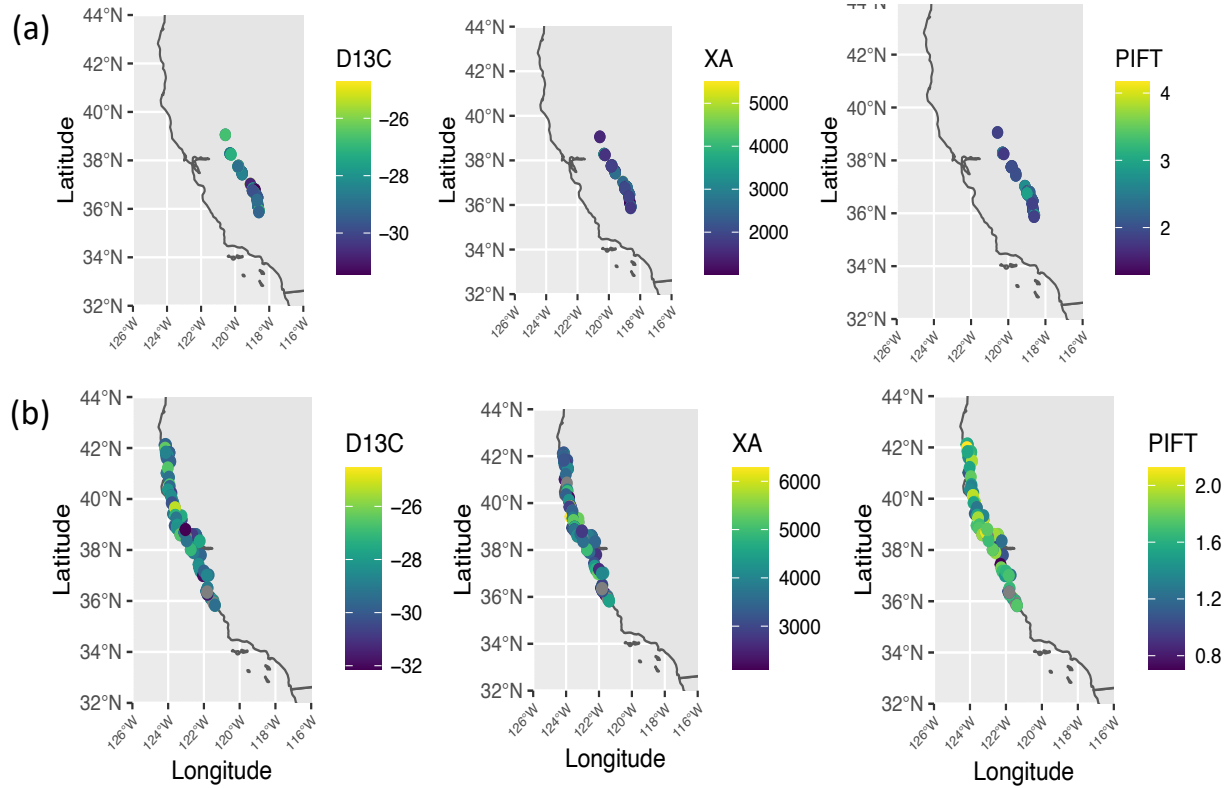

1070  
1071  
1072  
1073  
1074  
1075  
1076  
1077  
1078  
1079  
1080  
1081  
1082  
1083  
1084  
1085  
1086  
1087  
1088  
1089  
1090  
1091  
1092  
1093  
1094  
1095

**Figure 2.** Phenotypic variability across the species' natural distribution range based on common garden experiments. Carbon isotope discrimination (D13C), total xylem area (XA) and osmotic pressure (PIFT) in (a) giant sequoia and (b) coast redwood.

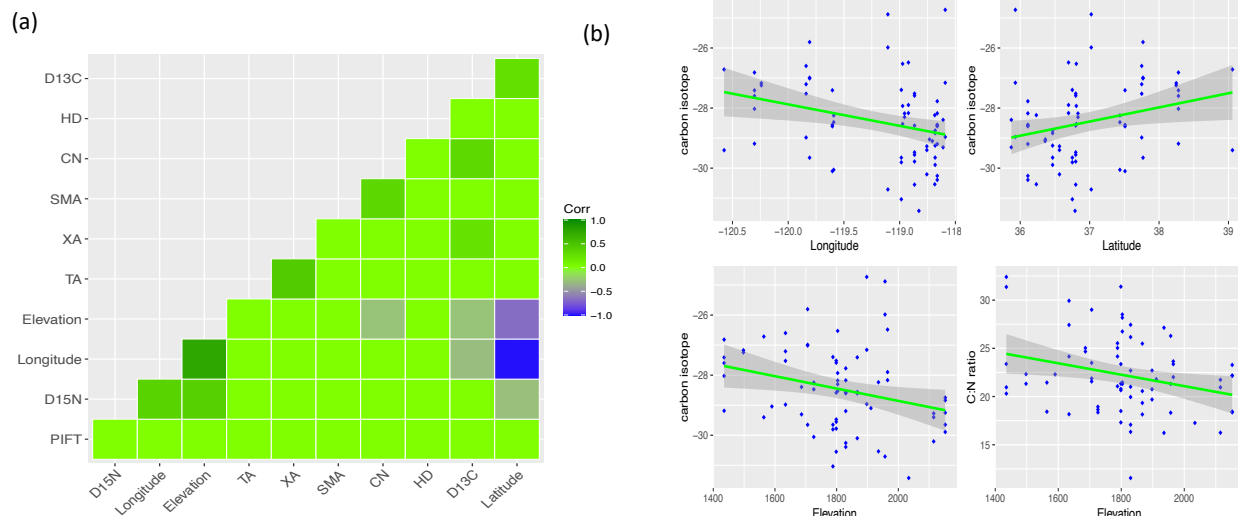

1096  
1097  
1098  
1099  
1100  
1101  
1102  
1103  
1104  
1105  
1106  
1107  
1108  
1109  
1110  
1111  
1112  
1113  
1114  
1115  
1116  
1117  
1118  
1119  
1120  
1121  
1122  
1123  
1124  
1125  
1126  
1127  
1128

**Figure 3.** Correlations among drought-related traits and geographical variables in giant sequoia. (a) Heatmap showing R for all combinations of variables; (b) scatterplots of significant correlations (P value<0.05) among geographic variables and carbon isotope discrimination and C:N ratio. Full trait names can be found in Table 1.

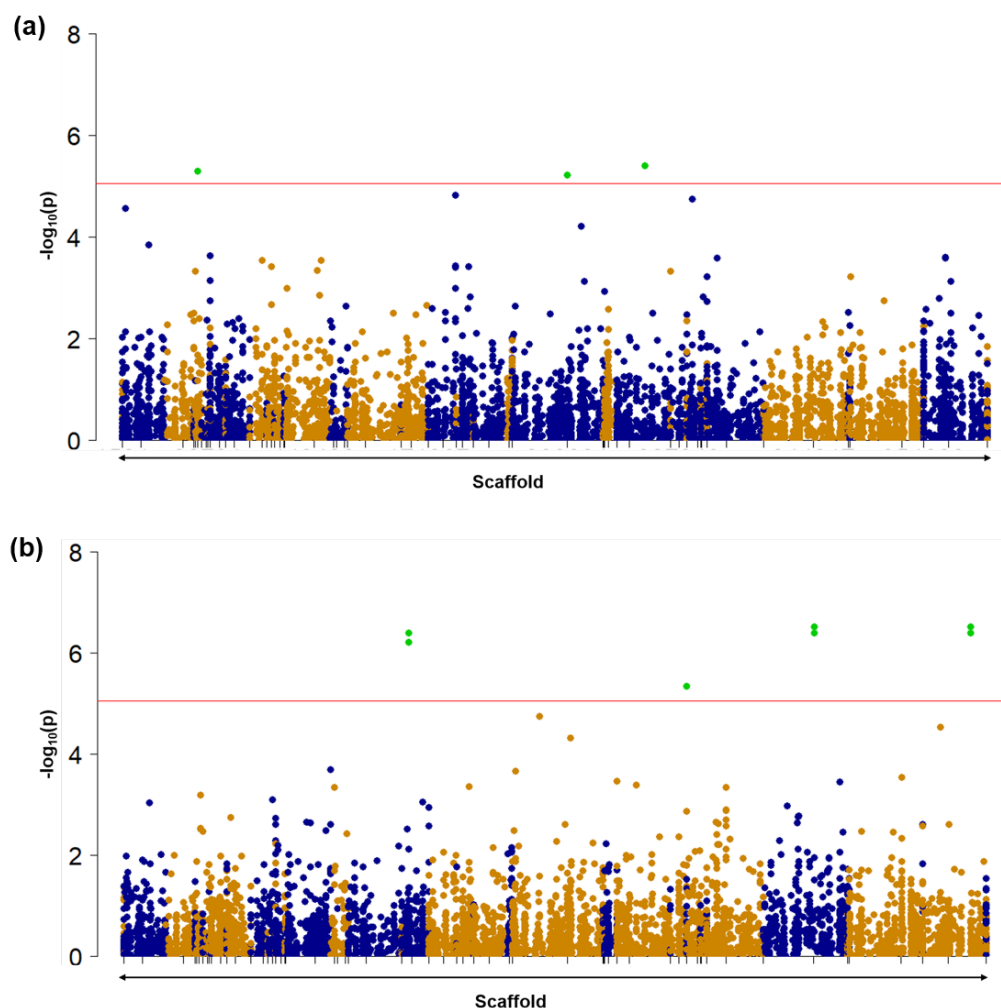

1129  
1130  
1131  
1132  
1133  
1134  
1135  
1136  
1137  
1138  
1139  
1140  
1141  
1142  
1143  
1144  
1145  
1146  
1147  
1148

**Figure 4.** Manhattan plot of SNP markers generated by GEMMA using multivariate linear mixed model (mvLMM) in SESE. (a) manhattan plot indicate the mvLMM analysis with the phenotypic traits SMA, PIFT, SD, D13C, CN and (group 1) (b) manhattan plot indicating the mvLMM analysis with the phenotypic traits D15N, TA, XA, HD and FA (group 2) in SESE. In the Manhattan plot y-axis represent the p-value of SNP markers in  $-\log_{10}$  and the x-axis is chromosomal positions. The red line represents genome-wide significant cut-off ( $p$ -value  $< 9.00 \cdot 10^{-6}$ ). The green dot over the genome-wide significant cut-off (red line) represents the significant SNPs ( $p$ -value  $< 9.00 \cdot 10^{-6}$ ).

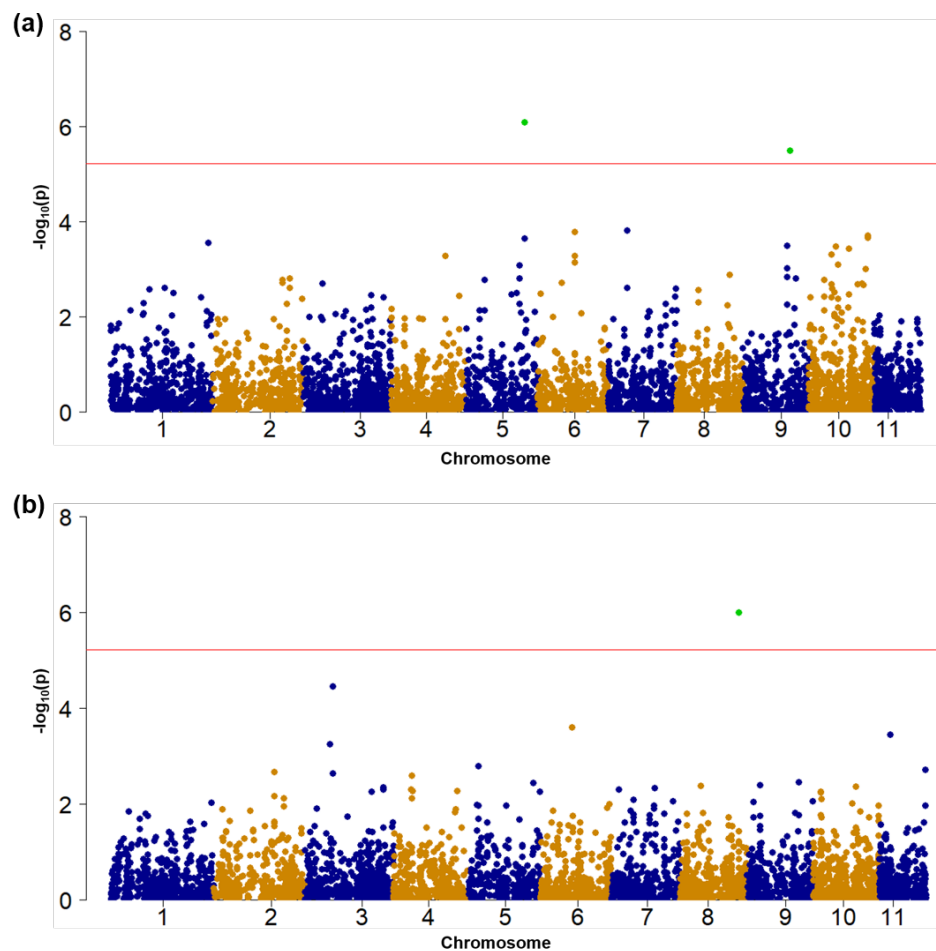

1149  
1150  
1151  
1152  
1153  
1154  
1155  
1156  
1157  
1158  
1159  
1160  
1161  
1162  
1163  
1164  
1165  
1166  
1167  
1168  
1169

**Figure 5.** Manhattan plot of SNP markers generated by GEMMA using multivariate linear mixed model (mvLMM) in SEGI. (a) Manhattan plot indicate the mvLMM analysis with the phenotypic traits SMA, PIFT, D13C, CN and D15N (group 1) and (b) manhattan plot indicate the mvLMM analysis with the phenotypic traits TA, XA, HD (group 2) in SEGI. The red line represents genome-wide significant cut-off ( $p\text{-value} < 6.00 \cdot 10^{-7}$ ). The green dot over the genome-wide significant cut-off (red line) represents the significant SNPs ( $p\text{-value} < 6.00 \cdot 10^{-7}$ ).

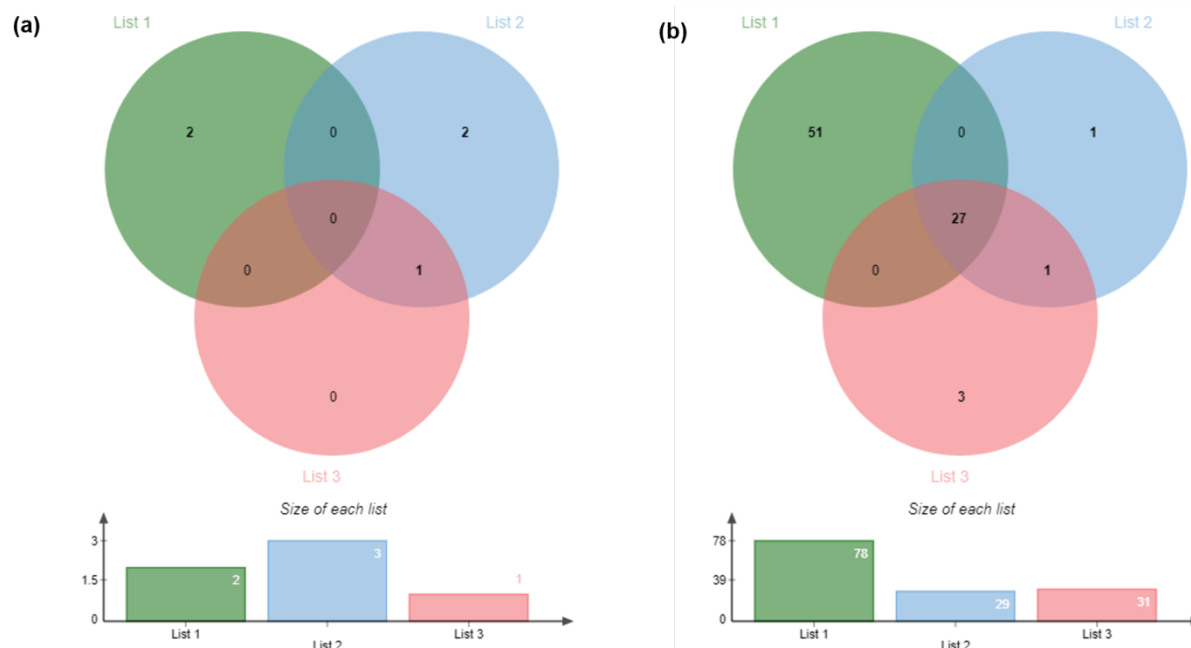

1170  
1171  
1172  
1173  
1174  
1175  
1176  
1177

**Figure 6. Venn-diagrams** representing the common significant SNPs identified by all three GWAS analyses including GLM at TASSEL, uLMM and mvLMM at GEMMA in SEGI (a) and SESE (b). List 1 is the total number of SNPs identified by GLM, list 2 is total number of SNPs identified by uLMM and list 3 is total SNPs identified by mvLMM.
